## **Cold-passaged isolates and bat-swine influenza A chimeric viruses as modified live-attenuated vaccines against influenza A viruses in pigs**

1 Annika Graaf<sup>1</sup>, Philipp P. Petric<sup>2,3,4</sup>, Julia Sehl-Ewert<sup>5</sup>, Dinah Henritzi<sup>1</sup>, Angele Breithaupt<sup>5</sup>, Jacqueline  
2 King<sup>1</sup>, Anne Pohlmann<sup>1</sup>, Fabian Deutschens<sup>6</sup>, Martin Beer<sup>1</sup>, Martin Schwemmle<sup>2,4</sup>, Timm Harder<sup>1</sup>

3 <sup>1</sup> Institute of Diagnostic Virology, Friedrich-Loeffler-Institut, 17493 Greifswald-Insel Riems,  
4 Germany

5 <sup>2</sup> Institute of Virology, Medical Center, University of Freiburg, 79104 Freiburg, Germany

6 <sup>3</sup> Spemann Graduate School of Biology and Medicine, University of Freiburg, 79104 Freiburg,  
7 Germany

8 <sup>4</sup> Faculty of Medicine, University of Freiburg, 79104 Freiburg, Germany

9 <sup>5</sup> Department of Experimental Animal Facilities and Biorisk Management, Friedrich-Loeffler-Institut,  
10 17493 Greifswald-Insel Riems, Germany

11 <sup>6</sup> Ceva Santé Animale, 17493 Greifswald-Insel Riems, Germany

12

13 **\*Correspondence:**

14 Prof. Dr. Timm Harder

15 [timh.harder@fli.de](mailto:timh.harder@fli.de)

16 **Abstract (max 200)**

17 Swine influenza A virus (swIAV) infections in pig populations cause considerable morbidity and  
18 economic losses. Frequent reverse zoonotic incursions of human IAV boost reassortment opportunities  
19 with authentic porcine and avian-like IAV in swine herds potentially enhancing zoonotic and even pre-  
20 pandemic potential. Vaccination using adjuvanted inactivated full virus vaccines is frequently used in  
21 attempting control of swIAV infections. Accelerated antigenic drift of swIAV in large swine holdings  
22 and interference of maternal antibodies with vaccine in piglets can compromise these efforts.  
23 Potentially more efficacious modified live-attenuated vaccines (MLVs) bear the risk of reversion of  
24 MLV to virulence. Here we evaluated new MLV candidates based on cold-passaged swIAV or on  
25 reassortment-incompetent bat-IAV-swIAV chimeric viruses. Serial cold-passaging of various swIAV  
26 subtypes did not yield unambiguously temperature-sensitive mutants although safety studies in mice  
27 and pigs suggested some degree of attenuation. Chimeric bat-swIAV expressing the hemagglutinin and  
28 neuraminidase of an avian-like H1N1, in contrast, proved to be safe in mice and pigs, and a single nasal  
29 inoculation induced protective immunity against homologous challenge in pigs. Reassortant-  
30 incompetent chimeric bat-swIAV vaccines could aid in reducing the amount of swIAV circulating in  
31 pig populations, thereby increasing animal welfare, limiting economic losses and lowering the risk of  
32 zoonotic swIAV transmission.

33 **Keywords:** Influenza A virus, swine, cold-passaged influenza virus, bat influenza chimera, modified  
34 live-attenuated vaccine

35

36 **Introduction**

37 Worldwide, domestic pigs are clinically affected by swine influenza A virus (swIAV) infections  
38 comprising the hemagglutinin (HA) subtypes H1 or H3, and the neuraminidase (NA) subtypes N1 or  
39 N2. Within each subtype several viral lineages exist which are defined on basis of their original host  
40 origin as avian (av), human (hu) or pandemic (pdm). A corresponding nomenclature proposed by  
41 Anderson et al. (2016) related to phylogenetic analyses refers to those lineages as 1A (=pdm), 1B  
42 (=hu), and 1C (=av). Infections are associated with disease and economically significant losses,  
43 especially in piglet rearing and reproduction (Brown, 2000; Rajao et al., 2014; Vincent et al., 2014).  
44 Complex and synergistic interactions of swIAV infections with other pathogenic or opportunistic viral  
45 and bacterial infectious agents contribute to an aggravation of disease which is broadly referred to as

46 the porcine respiratory disease complex, PRDC (Brockmeier, 2002; Deblanc et al., 2017; Pirolo et al.,  
47 2021; Rajao et al., 2018; Saade et al., 2020). Removing pathogens from the PRDC, e.g. by antibiotic  
48 treatment or vaccination, disentangles synergistic effects resulting in an overall improved animal health  
49 status and in reduced economic losses (Fachinger et al., 2008).

50 SwIAV are closely related to IAV circulating in the human population (Anderson, 2021; Chauhan et  
51 al., 2020). In fact, reciprocal transmissions across the porcine/human interface are observed regularly  
52 and significantly contribute to the expansion of swIAV variability in pig populations (Chastagner et  
53 al., 2019; Nelson et al., 2012; Neumann et al., 2009). Pigs are also susceptible to IAV of avian origin,  
54 further adding to the diversity of circulating swIAV. Pigs therefore resemble transitional influenza  
55 virus hosts or “mixing vessels” which facilitate the reassortment of IAV genomes of different host  
56 origins (Hass et al., 2011; Ma et al., 2009; Webster, 1997). This opens wide opportunities for zoonotic  
57 transmissions of reassorted swIAV with unknown phenotypic properties which might include  
58 pandemic potential as documented by the most recent human influenza pandemic of 2009 originating  
59 from reassorted swIAV in Mesoamerica (Short et al., 2015).

60 Recent extensive studies specified a broad and complex reservoir of swIAV with zoonotic and even  
61 pre-pandemic potential in European, Asian and American domestic swine populations (Henritzi et al.,  
62 2020; Sun et al., 2020; Vincent et al., 2008). In European pig populations, a dramatically increased  
63 genetic complexity of four lineages of swIAV, H1N1 of avian and of pandemic origin, H1N2 and  
64 H3N2, various reassortants thereof and further sporadic human-to-swine spillover variants has been  
65 described since 2010 (Henritzi et al., 2020; Krog et al., 2017). Increasing sizes of swine breeding herds  
66 and other intensification measures of pig production have provided swIAV with enriched opportunities  
67 to establish enzootic, self-sustaining infections in large herds (Pitzer et al., 2016; Ryt-Hansen et al.,  
68 2019). Swine influenza, in Europe, is currently not subject to any statutory reporting, and harmonized,  
69 officially orchestrated monitoring programs and control strategies are not implemented.

70 Besides improving biosafety to block swIAV incursions into swine herds, vaccination is the key  
71 preventive measure to combat influenza in pigs (Rahn, 2015; Sandbulte et al., 2015; Vincent, 2017).  
72 Currently available commercial influenza vaccines for use in swine are essentially based on adjuvanted  
73 inactivated whole virus (AIWV) vaccines. Administration of oil-adjuvanted AIWV by parenteral  
74 injection establishes a short-lived systemic immunity (Van Reeth et al., 2013) comprising strain-  
75 specific neutralizing antibodies primarily against the HA and to a lesser extent against the NA  
76 glycoproteins of swIAV as the main effectors conferring protection (Padilla-Quirarte et al., 2019). Cell-  
77 mediated immunity induced by AIWV has not been investigated thoroughly due to the complexity of

78 the assays and because of a general consent on the predominant role of neutralizing antibodies. The  
79 latter often confer a narrow protection window and cross-protection against a wide spectrum of  
80 antigenically distinct variants is rare. Frequent re-vaccinations are not always effective to counteract  
81 these shortcomings; instead, complex cross boosting scheme using carefully selected heterologous  
82 vaccine antigens can be successful in widening protection efficacy (Chepkwony et al., 2020). In  
83 addition, transfer of colostral maternal immunity from vaccinated sows to suckling piglets does not  
84 induce sterile immunity (Genzow et al., 2018): While clinical sequelae of an swIAV infection are  
85 reduced in such piglets, they virus infection itself is not prevented so they have been suspected drivers  
86 of endemic swIAV infections in large herds (Ryt-Hansen et al., 2020). At the same time, interference  
87 with maternally derived swIAV antibodies restricts the use of AIWV in piglets during their first ten  
88 weeks of life, and most vaccines are licensed for use in pigs from 56 days of age only (Deblanc et al.,  
89 2018; Everett, 2021).

90 Modified live-attenuated vaccines (MLVs), in contrast, are known to induce both humoral and T-cell  
91 mediated immunity including a mucosal component depending on the application route (Pollard et al.,  
92 2021). Mucosally administered replication-competent influenza vaccines therefore are expected to  
93 combine several advantages: they supposed to induce immunity in the airway epithelium, i.e. the  
94 primary location of viral entry and initial replication and this abrogates intraepithelial spread, and  
95 decreased viral excretion (Lavelle et al., 2021). In addition, mucosal application to suckling piglets  
96 would evade interference with maternal derived, systemic (non-mucosal) neutralizing antibodies.  
97 Several attempts to develop efficacious influenza MLV for use in swine have been reported,  
98 culminating in the licensing of a bivalent MLV which was attenuated by a C-terminal deletion of the  
99 NS protein (Genzow et al., 2018; Solorzano et al., 2005; Vincent et al., 2007). Despite initial success,  
100 this vaccine had to be withdrawn from the market after a short period of use in North American swine  
101 populations due to reassortment with endemic wild-type swIAV and, hence, indirect reversion to  
102 virulence (Sharma et al., 2020). Thus, despite of their obvious advantages, MLV vaccines can bear  
103 significant risks for reversion to virulence and disease, and also the potential for shedding which, in  
104 the case of swIAV, created public health concerns (Vincent, 2017).

105 Temperature-sensitive (*ts*) mutant IAV realize another attenuation principle that has been utilized in  
106 MLVs for human use: they show an at least 100-fold reduced replication efficacy at higher incubation  
107 temperatures *in vitro*; hence, they replicate efficiently in upper airway epithelia but not at higher  
108 temperatures in deeper airway tissues (Broadbent et al., 2014; Chan et al., 2008; Chen et al., 2010; He  
109 et al., 2013; Isakova-Sivak et al., 2011). While attenuated (*att*), *ts* mutants remain competent to induce

110 protective mucosal immunity. Along this line, quadrivalent influenza vaccines have been approved for  
111 safe use in humans, particularly in children (Belshe, 2004). Nevertheless, such mutants still bear the  
112 intrinsic risk of reassorting with field viruses which challenges their safety. However, reassortment  
113 competence with circulating field viruses are blocked in reverse genetically (*rg*) constructed chimeric  
114 (*ch*) viruses carrying the HA and NA of mammalian or avian IAV in the backbone of bat influenza A  
115 viruses (bt IAV) (Ciminski et al., 2017; Juozapaitis et al., 2014; Ma et al., 2015; Schon et al., 2020;  
116 Yang et al., 2017; Zhou et al., 2014). This would confer a substantial gain in influenza MLV safety.  
117 In this study, safety and efficacy of MLV vaccines based on newly developed, serially cold-passaged  
118 swIAV of several European lineages or on ch-bt IAV were assessed in mice and pigs. Evidence from  
119 single vaccination-challenge experiments in pigs using ch-bt IAV showed clinical protection and  
120 reduced excretion and spread of challenge virus.

121

## 122 **Results**

### 123 **Serial cold-passaging of swIAV at 28°C resulted in *ts-like* mutant influenza viruses**

124 In order to obtain a sufficiently high-titred virus stock for serial passaging experiments, selected  
125 parental swIAV 531 (H3N2), 541 (H1pdmN2) and 1670 (H1avN1), all obtained from pigs with  
126 respiratory disease on European farms (Table 1), had received 2-4 passages in MDCK-II cells at 37°C.  
127 As expected, these low passage isolates, designated par531, par541 and par1670 generated higher virus  
128 titers in MDCK-II cell culture at 37°C compared to 28°C (Figure 1 A, D, G). Maximum titers at 37°C  
129 were reached within 24 hours and measured up to three log<sub>10</sub> steps higher compared to 28°C until 72  
130 hours. Next, 60 serial cold passages (cp) were performed with the parental swIAV in either MDCK-II  
131 or in a swine testicle cell line (ST-0606) resulting in the virus stocks cp531 and cp541 and cp1670.  
132 Only cp1670 passaged in MDCK-II cells but not in ST cells produced higher virus titers at an earlier  
133 timepoint at 28 versus 37°C with maximum titer of up to 10<sup>6</sup> TCID<sub>50</sub>/mL (Figure 1 F, I). These growth  
134 differences were less striking for cp531 and cp541 passaged on both MDCK-II and ST cells (Figure 1  
135 D-G, E-H). However, all cold passaged viruses induced a cytopathic effect at 28°C but not at 37°C  
136 (not shown). Thus, only cp1670 revealed replication features described for *ts* mutant influenza viruses  
137 (Martinez-Sobrido et al., 2018).

138

139 **The cold-adapted swIAV reversed to cytopathogenic replication following consecutive**  
140 **passaging at 37°C**

141 Whole genome sequencing by the MinION technologies revealed for the majority of the cp swIAV,  
142 non-synonymous mutations were mainly detected in gene segments coding for the polymerase complex  
143 (PA, PB1, PB2 and NP). In contrast, hardly any coding mutations occurred in the HA, NA, M and NS  
144 segments (Table 2). The parallel passages of the same parental isolate in MDCK-II and ST cell lines,  
145 respectively, resulted in concordant amino acid substitutions at positions PB2 D87G and E158G, in  
146 cp531, and cp1670 (highlighted in bold type in Table 2). Illumina whole genome sequencing confirmed  
147 their presence as did Sanger sequencing of short PCR amplicons generated with specific primers for  
148 the relevant regions (not shown). None of these mutations have previously been described in *ts* mutants  
149 of other other IAV. However, Zhou et al. (2011) showed that PB2-E158G might play a role in the  
150 adaptation of avian PB2 genes to other mammals. No coding mutations occurred in the regions of the  
151 HA and NA proteins known as epitopes of humoral immunity (Petukhova et al., 2017). Based on these  
152 findings, the serially cold-adapted viruses were considered antigenically similar to their parental  
153 isolates.

154 Next, each virus, after 60 cold passages, was subjected to ten serial passages in both MDCK-II and ST  
155 cells at 37°C as shown in Figure 2 to provide information on the frequency of possible reversion to the  
156 thermophilic cytopathic replication. While cp531, cp541 and cp1670 initially did not induce cytopathic  
157 effects while passaged at 37°C, return of cytopathogenic replication at 37°C was noticed in all strains  
158 with the exception of cp531 (H3N2) (supplemental table 1). To determine the genetic basis of the  
159 phenotypic reversion, we analyzed the mutations within PB2 segment using an NGS approach.  
160 Interestingly, cp541 (H1pdmN2) showed a reversion of its mutation E158G and cp531 reversed  
161 mutations V730I and Q748L, whereas cp1670 showed no reversions of the mutations in PB2 segment  
162 selected during cold-passaging. In summary, cp541 and cp1670 reversed to cytopathogenic replication  
163 following consecutive passaging at 37°C accompanied by reversion of the mutation obtained during  
164 passaging at 28°C or *de novo* mutations.

165

166 **Ch-bt IAV encoding wildtype or a NS1 with IFN antagonistic are replication competent**

167 In addition to the cold-adapted swine IAV, reassortment-incompetent vaccine candidates comprising  
168 recombinant ch-bt IAV expressing the 1670 glycoproteins (H17-1670) and, as an additional safety  
169 measurement, a ch-bt NS1 double-mutant virus encoding the NS1 R39A and K42A mutations (H17-  
170 1670-NS1-2x) were generated (Figure 3). To analyze their replication competence, viral growth

171 kinetics were performed on MDCK-II and ST cells (Figure 1 J-L). The H17-1670 virus showed  
172 efficient growth on both cell lines, reaching titers of up to  $8 \log_{10}$  PFU/ml. Compared to that, the H17-  
173 1670-NS1-2x virus showed highly impaired replication efficiency on both cell lines, with viral titers  
174 being up to  $2 \log_{10}$  lower than for the NS-wt virus at most timepoints. Interestingly, both viruses reach  
175 similar titers on ST cells after 72 hpi. As the two NS1 mutations were described to impair the IFN-  
176 antagonist function of the virally encoded NS1 protein, additional growth kinetics were performed on  
177 MDCK-NS1-NPro cells, expressing functional IFN-antagonists of an IAV strain (NS1) and bovine  
178 viral diarrhea virus (NPro) (Figure 1L). Consistent with our previous observation with ch-bt NS1  
179 double-mutant virus expressing the H7 and N7 of A/SC35M (Juozapaitis et al., 2014), on this cell line,  
180 the H17-1670-NS1-2x virus showed identical replication efficiency as the wt NS virus on the MDCKII  
181 cells (compare Figure J, L). Of note, viral titers of both ch-bt IAVs are sufficiently high to be used for  
182 *in vivo* experiments.

#### 183 184 **Swine adapted IAV and bat viruses show different degrees of attenuation in mice**

185 Virus strain A/Puerto Rico/8/1934 (H1N1) [PR8] was used as a virulent positive control to weigh  
186 clinical signs observed with parental and cp swIAV as well as ch-bt viruses. A predominantly severe  
187 clinical course associated with pneumonic alterations in the lung became evident when an intranasal  
188 inoculum volume of  $40 \mu\text{L}$  of PR8 was used (supplemental figure 1). Four out of 8 inoculated mice  
189 reached humane endpoints within 10 days of observation. All inoculated mice showed higher RNA  
190 viral loads in lung tissues than in trachea or nose. A necrotizing bronchointerstitial pneumonia was  
191 diagnosed with abundant, intralesional IAV antigen in bronchiolar and alveolar epithelial cells of  
192 inoculated animals at 2 and 10 dpi (supplemental figure 2 A, B; supplemental figure 3E, J, O, T).  
193 Seroconversion occurred in all inoculated animals surviving until 10 dpi (supplemental figure 4).  
194 However, transmission to in-contact animals was not observed as none of the sentinels developed  
195 clinical symptoms nor showed any viral RNA loads by RT-qPCR examination in tissue samples and  
196 did not seroconvert.

197 None of the parental swIAV (par531, par541, par1670) induced clinical respiratory manifestations in  
198 the inoculated or in the contact mice. Substantial body weight reductions of up to 25% were measured  
199 in only one inoculated animal of group par541 and in three inoculated animals of group par1670  
200 (supplemental figure 1). The mouse of group par541 recovered and survived until 10 dpi. Two mice of  
201 group par1670 showed significant weight loss but did not reach the 25% threshold until 10 dpi.

202 Compared to PR8 the virulence of par swIAV in mice was markedly reduced. Viral loads in two mice  
203 sacrificed per group at 2 dpi were higher in lungs compared to nasal mucosa. In the lungs,  
204 bronchointerstitial pneumonia was found in the majority of animals, again associated with IAV antigen  
205 detected in many bronchial and fewer alveolar epithelial cells (supplemental figure 2A). At day 10 pi,  
206 residual virus RNA was detected predominantly in lung tissues. This includes some contact animals  
207 suggesting transmission of parental swIAV by direct contact. Only a few mice in each par swIAV  
208 group seroconverted (supplemental figure 4). Accompanying this, bronchointerstitial pneumonia was  
209 found in several but not all animals, however viral antigen was still detectable in two mice after  
210 1670MDCK infection (supplemental figure 2A; exemplarily shown in supplemental figure 3H).

211 Mice infected with either one of the four serially cold-passaged swIAV (cp531, cp541, cp1670MDCK,  
212 cp1670ST) as well as the respective contact animals did not show any respiratory signs of disease.  
213 However, two mice inoculated with cp1670MDCK showed sunken flanks, slightly ruffled fur  
214 associated with weight loss of < 25% between 4 to 7 dpi (supplemental figure 1). Viral loads were  
215 detected in turbinate tissues of cp inoculated mice at 2 dpi (Figure 4). Interestingly, for the two cp1670  
216 viruses these were higher compared to par1670. Conversely, viral loads of cp swIAV in lung tissue at  
217 day 2 were markedly lower compared to par swIAV. Nevertheless, lesion-associated viral antigen was  
218 found in one mouse each after infection with cp531 or cp1670MDCK, respectively, but not after cp541  
219 or cp1670ST infection (supplemental figure 2B).

220 At 10 dpi, residual viral RNA was detectable in nasal tissues but hardly in lung tissues of cp inoculated  
221 mice. Within 10 days, seroconversion could be measured in some cp-inoculated mice but not in the  
222 contact animals, similar to the groups of the parental viruses (supplemental figure 4). None of the mice  
223 exhibited viral antigen in the lungs. However, in accordance with antigen labeling data from 2 dpi,  
224 infection with cp531 and cp1670MDCK led to pneumonia in all mice, indicating prior virus replication  
225 in lung tissue (supplemental figure 2A).

226 To evaluate the growth properties and pathogenicity of the ch-bt IAV vaccine candidates *in vivo*, five  
227 C57BL/6 mice each were intranasally inoculated with  $10^4$  PFU/ml of either H17-1670 or H17-1670-  
228 NS1-2x. The mice were sacrificed 3 dpi to determine viral lung and nose titers (Figure 4 F-G). While  
229 the H17-1670 virus reached viral titers of up to  $10^7$  PFU/ml in the lungs of infected mice, no virus  
230 could be isolated from the upper airway (nose). Interestingly, no infectious H17-1670-NS1-2x was  
231 identified in both the upper airway and lungs of infected mice, suggesting that loss of the RNA-binding  
232 activity in NS1 caused severe attenuation *in vivo*.



233 In summary, as expected, cp swIAV showed a different replication pattern in C57BL/6 mice compared  
234 to par swIAV. The predominant replication in nasal versus lung tissues suggests features of an *att*  
235 phenotype of cp swIAV in mice as described for *ts* mutant IAV (Broadbent et al., 2014; Isakova-Sivak  
236 et al., 2011). In addition, the level of cp swIAV replication in mice might be overall reduced compared  
237 to the parental viruses as less of the inoculated mice seroconverted. However, diagnosis of pneumonia  
238 after cp531 and cp1670MDCK infection indicates pulmonary replication of cp swIAV to a certain  
239 extent. In contrast, and similar to other ch-bt IAV (Juozapaitis et al., 2014), H17-1670 did not show  
240 obvious signs of disease despite efficient replication in the lung.

241

### 242 **Cold-passaged swIAV show varying degrees of attenuation in pigs**

243 In order to analyze the safety of cp swIAV in pigs, eight pigs were intranasally inoculated with  $10^6$   
244 TCID<sub>50</sub> of cp531, and at day 1 p.i. two contact pigs were associated. Results were compared to a group  
245 of four age-matched pigs which received the same dose of par531. Neither the par nor the cp virus  
246 induced clinical signs including a rise in body temperature, the exception being a single cp531-  
247 inoculated animal that showed a light cough at 3 dpi (supplemental figure 5A, B). Animals of both  
248 groups, including the cp sentinels, excreted virus nasally at days 2, 4 and 5 p.i. (Figure 5A, sentinels  
249 not shown). With regard to the dynamics and intensity of nasal excretion, there were no significant  
250 differences between the cp and par groups. Respiratory tissues of both groups were found to be virus  
251 positive at 4 dpi (Figure 5B). A significantly increased viral load of the parental virus was found in the  
252 bronchial swabs and in the BALF materials, whereas no significant differences were found for any of  
253 the remaining tissues. As expected, within the four to five days observation period, none of the animals  
254 seroconverted (not shown).

255 For both cp531 and its parent virus par531, viral antigen was detected in varying amounts in the lung,  
256 trachea, and nose (supplemental figure 6A). For cp531, scores given for lung and trachea were slightly  
257 higher (max score 3) than observed for par531 (max score 2). In the nasal mucosa, viral antigen was  
258 detected in the cp531 (max score 1) and par531 group (max score 3). No viral antigen was present in  
259 cp531 contact animals (not shown). In line with immunohistochemistry, histopathological changes of  
260 varying severity were present irrespective of the virus strain used as indicated in supplemental figure  
261 6B. Necrotizing inflammation of bronchi and bronchioles was found in all animals inoculated with  
262 cp531 (max score 2.5) and par531 (max score 2). Suppurative inflammation was significantly more  
263 frequently found in cp531 pigs (max score 2), than in the par531 group (max score 1.5). Likewise,

264 peribronchiolar lymphocytic cuffing associated with inflammation was consistently present in the  
265 cp531 group (max score 2) while comparable lesions were found in only two out of four par531  
266 inoculated animals (max score 2). Inflammation of the alveolar septa was present in both groups (max  
267 score 2) whereas mild tracheal and nasal lesions were only sporadically seen. In contrast to cp531 and  
268 par531, the two cp531 contact animals showed only mild histopathological alterations.

269 As for the cp531 virus, eight pigs were intranasally inoculated with  $10^6$  TCID<sub>50</sub> of cp541. Results were  
270 compared to a group of eight age-matched pigs which received the same dose of par541. Inoculation-  
271 related clinical signs including increase in body temperature were not observed in any pigs inoculated  
272 with par541 or cp541 (supplemental figure 5C, D). Cp541 inoculated animals nasally excreted  
273 substantial viral loads although significantly reduced compared to par541 (Figure 5C), which is  
274 corroborated by viral loads measured in tissues of nasal conchae at day 4 (Figure 5D). Similarly,  
275 significantly reduced viral loads for cp541 were observed in respiratory tissues, particularly in deeper  
276 respiratory tissues (bronchi, BALF and lung lobes and tributary lymph nodes (Figure 5D). No  
277 seroconversion occurred within 4 days post infection.

278 In line with virological data, less viral antigen was detectable in the tissues of cp541 inoculated animals  
279 compared to the par541 group (supplemental figure 6C; exemplarily shown in Figure 6). While the  
280 lungs of five of eight animals inoculated with par541 were antigen-positive (max score 2), viral antigen  
281 was found in only one cp541 inoculated pig (score 1). Significantly higher antigen levels were also  
282 found in the trachea of par541 inoculated animals (max score 2) than in the cp541 group. Nasal viral  
283 antigen amounts were comparable in both groups (max score 3 and 2, respectively).  
284 Histopathologically, only minimal changes were detected in cp541 inoculated animals compared to its  
285 parental strain (supplemental figure 6D). While the majority of animals inoculated with par541 showed  
286 necrotizing (max score 3) and suppurative pulmonary inflammation (max score 2.5), only one cp541  
287 pig revealed mild suppurative lesions (score 1). In contrast to the small number of affected cp541  
288 inoculated animals, the par541 group showed significant lymphocytic peribronchial reaction (max  
289 score 3) and inflammation of the alveolar septa (max score 3). Mainly mild histopathological changes  
290 of the trachea were present in the par541 (max score 1) and cp541 groups (max score 2). Infection-  
291 related lesions were present in the nose of both groups (max score 3).

292 For cp1670MDCK and cp1670ST, eight pigs each were intranasally inoculated with  $10^6$  TCID<sub>50</sub> of  
293 cp1670MDCK or cp1670ST. Results were compared to a group of eight age-matched pigs which  
294 received the same dose of par1670. Similar to the 541-virus pair, no clinical signs were observed

295 (supplemental figure 5E-G). Interestingly, animals inoculated with the MDCK-II cp strain nasally  
296 excreted significantly less virus than those which received the ST-grown cp strain (Figure 5E). A trend  
297 for reduced replication efficacy of the cp1670MDCK- versus the ST-grown virus was also evident in  
298 deeper respiratory tissues (Figure 5F). Both cp viruses revealed significantly reduced replication  
299 compared to par1670 in the deeper parts of the respiratory tract. Seroconversion was not detected in  
300 any of the animals.

301 Consistent with the lower viral genome levels, all cp1670MDCK inoculated animals tested negative  
302 by immunohistochemistry (supplemental figure 6E). In contrast, inoculation with cp1670ST led to  
303 limited positive results only in the lung and trachea (max score 1), but achieved higher scores in the  
304 nose (max score 3) (exemplarily shown in Figure 6). In all animals inoculated with the par1670 strain  
305 varying amounts of viral antigen were detected in the lung (max score 3), trachea (max score 2) and  
306 nose (max score 3). Corresponding to immunohistochemistry, histopathological changes significantly  
307 differed between par1670, cp1670MDCK and cp1670ST (supplemental figure 6E, F). While  
308 pulmonary, tracheal and nasal lesions occurred frequently and were predominantly moderate to severe  
309 in par1670 infected pigs, lesions were mild and occurred only occasionally in the cp1670ST group or  
310 were completely absent in the cp1670MDCK group.

311 Respiratory clinical signs and fever in SPF pigs intranasally inoculated with swIAV are infrequent and  
312 dependent on different factors e.g. strain and dose, health status and age of the pigs. Therefore, and in  
313 line with the European Pharmacopoe used here as a guideline, virological (virus loads, excretion titers)  
314 and immunohistological rather than clinical readouts have been used to assess safety of swIAV vaccine  
315 candidates. On basis of this system, cp541 and cp1670 but not cp531 did reveal characteristics of an  
316 attenuated (*att*) phenotype, i.e. reduced viral replication in deeper respiratory tissues in the target  
317 species, pig.

318

### 319 **Ch-bt IAV replicated asymptotically in pigs but ch-bt IAV H17-1670 replicated more** 320 **extensively compared to H17-1670-NS1-2x**

321 Eight pigs each were intranasally inoculated with  $10^6$  TCID<sub>50</sub> of H17-1670 or H17-1670-NS1-2x, and  
322 at day 1 p.i. two contact pigs were associated to each group. ch-bt IAV expressing H1av and N1av in  
323 the background of bt IAV H17 replicated in the inoculated pigs (Figure 7A, B). No inoculation-related  
324 clinical signs were registered in any of the pigs during the observation period (supplemental figure 7).  
325 All animals inoculated with H17-1670 excreted virus nasally on 2 and 4 dpi with substantial RNA  
326 loads (Figure 7A). In contrast, only two pigs inoculated with H17-1670-NS1-2x shed virus nasally,

327 and the viral load was significantly lower compared to H17-1670 (Figure 8A). Nasal excretion of either  
328 chimera in contact animals was not detected, at least these animals remained PCR-negative in nasal  
329 swabs within the four-day observation period after initial contact. H17-1670 replicated to significantly  
330 higher loads than the NS1-2x-chimera in upper respiratory tissues (conchae, trachea), but was hardly  
331 detectable in lung tissue samples (Figure 7B). Sentinels of chimera H17-1670, although PCR-negative  
332 in nasal swabs, showed discrete virus presence in the bronchi as well as in BALF. Negligible replication  
333 in the examined tissue and swab samples was evident for chimera H17-1670-NS1-2x. No  
334 seroconversion of the animals was detectable within the four-day observation period.

335 While, in summary, ch-bt IAV H17-1670 replicated efficiently in upper respiratory tracts and was also  
336 transmitted within four days of contact to sentinel pigs, H17-1670\_NS1-2x seemed to be over-  
337 attenuated and incapable of efficient replication in the respiratory tract of pigs.

338 As presented in supplemental figure 8A, neither the vaccinated nor the contact animals showed positive  
339 immunohistochemistry. Mild histopathological changes in the lung and trachea were found only  
340 sporadically in individual animals (supplemental figure 8B).

341

### 342 **Ch-bt IAV H17-1670 conveys protective effects against challenge of vaccinated pigs**

343 Due to the inconsistent safety studies of cp swIAV *in vitro* and in pigs in which cp531 did not clearly  
344 reveal an attenuated phenotype and because of the inconclusive mutation and reversion analysis of cp  
345 viruses, the focus concerning protective capacity was put on the ch-bt IAV. Eight pigs each were  
346 intranasally inoculated with  $10^6$  TCID<sub>50</sub> of H17-1670 or H17-1670-NS1-2x, and at day 1 p.i. each two  
347 contact pigs were associated. At day 21 p.i. the pigs were intranasally challenged with  $10^6$  TCID<sub>50</sub> of  
348 par1670. Each two naïve contact pigs were associated at day 1 post challenge. Animals vaccinated with  
349 chimera H17-1670 excreted virus at 2 and 4 dpi but not at 7, 10, 14 and 20 dpi. (Figure 8A). Detection  
350 of chimera H17-1670-NS1-2x in nasal swabs was limited to day 2 p.i. and negligible at 4 dpi with cq-  
351 values above 35 (Figure 8A).

352 After challenge with the homologous parental virus par1670 that has donated the HA and NA coding  
353 regions for the ch-bt IAV, at day 21 after vaccination no clinical signs of disease developed in either  
354 of the groups (supplemental figure 7). Animals of both vaccinated groups nasally excreted challenge  
355 virus at day 2 and 4 after challenge but at significantly lower levels than a group of eight mock-  
356 vaccinated pigs (Figure 8A, B). The mock-vaccinated group consisted of pigs that had been used for  
357 the safety studies of par1670. Significantly lower challenge virus loads in nasal swabs were found for

358 animals of chimera H17-1670 compared to H17-1670-NS1-2x. Within four days of contact  
359 unvaccinated sentinels got infected and nasally shed virus on 5 dpc. A similar pattern as for nasal  
360 excretion was also evident for other respiratory tissues: RNA loads were lowest for H17-1670  
361 vaccinated pigs and highest in mock-vaccinated animals while pigs vaccinated with H17-1670-NS1-  
362 2x took an intermediate position (Figure 8B).

363 In line with lower viral loads, also significantly less viral antigen was detected in all organs of the H17-  
364 1670 vaccinated group after challenge (supplemental figure 9A). While in H17-1670 vaccinated pigs  
365 substantial amounts of viral antigen were detected in the nose (max score 3), positive cells were only  
366 occasionally found in the lungs (max score 2) and were absent in the trachea (exemplarily shown in  
367 Figure 6). The lungs of the two contact animals of the H17-1670 challenge group were antigen-negative  
368 whereas the nasal mucosa of both animals and the trachea of one animal showed positive results. In  
369 contrast, the challenged H17-1670-NS1-2x group except for one inoculated animal, showed highly  
370 positive immunohistochemistry in all organs (max score 3). Likewise, the trachea and nose of both  
371 sentinels and the lung of one animal of the H17-1670-NS1-2x challenge group were antigen-positive.  
372 Overall histopathological alterations were most severe in par1670 inoculated animals (max score 3)  
373 while lesions, if present, were only mild to moderate in the two vaccinated groups (max score 2)  
374 (supplemental figure 9B). In particular, peribronchial lymphocytic cuffing and inflammation of the  
375 alveolar septa were significantly reduced in animals of the H17-1670 vaccinated group. Tracheal and  
376 nasal changes did not differ between the groups (max score 2 and 3, respectively). Histopathological  
377 alterations in contact animals of both vaccinated groups were mild to moderate or even absent.

378 In summary, despite strong attenuation, vaccination with chimera H17-1670-NS1-2x moderately  
379 reduced viral replication of the challenge virus par1670 compared to non-vaccinated animals, however,  
380 transmission to sentinels was not prevented. In contrast, vaccination with H17-1670 diminished viral  
381 replication of the par1670 to such an extent that transmission to sentinels was not observed,  
382 demonstrating the feasibility of bat chimeric viruses for live vaccine development.

383

## 384 **Discussion**

385 Vaccination remains the most effective prophylactic measure to prevent influenza virus infection in  
386 pigs (Rahn, 2015; Sandbulte et al., 2015; Vincent, 2017). However, some of the virus strains used in  
387 the current vaccines in Europe were isolated more than 20 years ago. Although antigenic drift in swIAV

388 seems not to be as striking as in human influenza strains uncertainty remains whether these vaccines  
389 can fully prevent formation of escape swIAV-variants. Recent studies have shown that resilient and  
390 broad protection against a wide range of antigenically diverse strains can be accomplished by serial  
391 boosting with different inactivated, adjuvanted vaccine strains; however, the type of strains and the  
392 order of booster vaccinations played a pivotal role in that study and had to be delineated empirically  
393 (Chepkwony et al., 2020). This leaves doubts regarding the practicability of such an approach in the  
394 field. Evidence from the field of the emergence of swIAV antigenic drift variants only recently raised  
395 questions about the use of the approved vaccines (Everett et al., 2019; Ryt-Hansen et al., 2020). This  
396 may be related to the altered epidemiology of the infection in large pig populations which can evidently  
397 favor a forced, population-specific antigen drift (Diaz et al., 2017; Rose et al., 2013; Ryt-Hansen et al.,  
398 2020). In face of the continuously increasing emergence of new swIAV variants in the field (Henritzi  
399 et al., 2020) and by considering the fact that the currently available vaccines on the European market  
400 solely comprise inactivated whole virus vaccines, novel concepts for swIAV vaccine design, ultimately  
401 aiming at a broader efficacy spectrum and widened flexibility for emerging strains, should be explored.  
402 Modified live-attenuated influenza vaccines (MLVs) mimic natural infection, are delivered  
403 intranasally, infect the upper respiratory tract and activate both humoral and cell-mediated immunity,  
404 thus providing more complete protection than inactivated vaccines (Sridhar, 2015). Several attempts  
405 to develop potentially more efficacious MLVs against swIAV infections in pigs have been reported  
406 previously (Loving et al., 2013; Pena et al., 2011). The potential benefits of MLVs must be weighed  
407 against the risks compromising biological safety (Martinez-Sobrido et al., 2018). Assessment of  
408 biological safety of MLVs includes the stability of the genetic markers linked to attenuation over  
409 several (at least five) passages in cell culture or in the target species and thus the exclusion of immediate  
410 reversion to the pathogenic phenotype. Furthermore, the (unintentional) horizontal spread of the MLV  
411 virus must be taken into account. An uncontrolled lateral spread from vaccinated animals could favor  
412 undesired mutations that affect antigenicity and/or attenuation. High-titred MLV virus excretion may  
413 also promote undesired transmission to other age or functional compartments of the herd or even to  
414 other species.

415 In the present study, two approaches to develop MLVs against swIAV were pursued, temperature-  
416 sensitive (*ts*) swIAV mutants and swIAV-bat IAV chimeras respectively: Our attempts to generate *ts*  
417 mutants of three antigenically diverse swIAV lineages by serial cold passaging of virus isolates in cell  
418 cultures did not yield conclusive results. Serial passaging in either MDCK or ST cell cultures under  
419 cold stress did not lead to significant mutations of HA and NA sequences, meaning the strains

420 remained antigenically unaltered. Despite some growth-related indication of an adaptation of the three  
421 viruses to replication at 28°C, no previously described genetic markers of *ts* mutants of human, equine  
422 or avian influenza viruses could be identified (Broadbent et al., 2014; He et al., 2013; Meyer et al.,  
423 2016; Rodriguez et al., 2018; Townsend et al., 2001). Nevertheless, the majority of passage-associated  
424 mutations accumulating in the three strains during cold passaging occurred in genome segments of the  
425 polymerase complex, especially in the PB2 segment; which is in line with established *ts* mutants  
426 derived from human and equine IAV lineages. One mutation (E158G), which was independently  
427 selected in two out of four cold passaged viruses might represent a marker. On the other hand, the  
428 plethora of coding mutations that differ between the four passage 60 viruses (Table 2) might signal  
429 ongoing selection and/or presence of multiple virus populations. Attempts to plaque-purify cp viruses  
430 failed (not shown), therefore bottleneck passaging at very low MOIs had to be applied. Presence of  
431 mixed and possibly instable virus populations was also suggested by the fast reversion of cp passage  
432 60 strains to thermophilic and cytopathic replication at 37°C during serial blind passaging  
433 (supplemental table 1). The future way forward might be to introduce the D87G and E158G mutations  
434 selected here, and other, previously described *ts*-related mutations, into parental swIAV via reverse  
435 genetics. In our *in vivo* experiments in mice and pigs, at least two cp strains displayed an attenuated  
436 phenotype after nasal application. In particular, reduced replication in lung tissues but not in nasal  
437 conchae was observed compared to infections with parental viruses. Yet, pneumonic lesions of cp-  
438 infected mice at 10 dpi suggested lung-associated replication also of at least some of the cp isolates.  
439 Despite these promising biological features, the inconclusive genetic data of cp swIAV established  
440 here led us to focus further work on the second approach of generating MLVs against swIAV infections  
441 in pigs: ch-bt IAV.

442 It was shown by antigenic mapping that the expressed swIAV glycoproteins were antigenically  
443 authentic. Our studies showed that both viruses replicated in cell culture and in the target species pig,  
444 although the virus with additional attenuating mutations in the NS1 segment was considerably weaker  
445 in all tested systems (lower growth in MDCKII and ST cell cultures and highly significantly lower and  
446 shorter-lasting ability to replicate in mice and pigs). Despite moderately high viral loads that were  
447 found in nasal swabs of the animals in the chimera without the additional NS1-mutations, transmission  
448 of this chimera to two sentinel animals could not be clearly demonstrated. However, natural bat-IAV  
449 infections have not yet been associated with pathogenicity for humans or non-bat mammals or other  
450 species and there is currently no evidence that the HA/NA replacement in bat-associated IAVs of  
451 subtype H17N10 could significantly increase the risk potential of these viruses, provided that only HAs

452 expressing a trypsin-sensitive cleavage site are used. In the end, our challenge experiments with  
453 vaccinated animals demonstrated a protective immunity which was mainly characterized by a highly  
454 negative challenge virus replication in the lower airways. The protective effect with regard to the  
455 measured viral loads was significantly lower in the group that received the NS1-attenuated chimera,  
456 yet still increased when compared to unvaccinated animals. A similar H17N10-based vaccine study  
457 was performed by the group of Lee et al. (2021). In this case, a H3N2 based bat-IAV chimera was  
458 generated expressing a truncated NS1 (NS aa1-128), designated MLV1. Vaccination with MLV1  
459 protected against heterologous viral challenge and the truncation mutant replicated to high viral lung  
460 titer compared to H17-1670-NS1-2x-infected swine. While the two mutations in NS1 abrogate the  
461 RNA-binding activity of NS1, the ability to bind RNA is not affected in the truncated NS1 protein.  
462 Since comparable virus doses were used in both studies, it seems that the truncated NS1 variant is less  
463 attenuated than a NS1 variant with defective RNA binding domain. Of note, MLV1, H17-1670-NS1-  
464 2x and ch-bt IAV H17-1670 expressing an intact NS1 did not develop any disease.

465 These findings are therefore in line with former studies, where chickens and ferrets inoculated with  
466 bat-IAV chimeras expressing (monobasic) HA and NA of a highly pathogenic avian influenza virus of  
467 subtype H5N1 did not develop disease nor pathological alterations but were protected against  
468 homologous challenge. Chimeras instantly replicated to high titers in ferrets but required multi-passage  
469 adaptation in chickens (Ren et al., 2019; Schon et al., 2020). Furthermore, the unsurpassed efficacy of  
470 MLVs for induction of mucosal immunity has been shown for various IAV candidates and licensed  
471 vaccines in North America based on NS1 truncations or temperature-sensitive mutants (Genzow et al.,  
472 2018). However, due to reassortment events with wild-type IAV, indirect reversion to virulence  
473 occurred for the North American vaccine (Sharma et al., 2020). All previous attempts were lacking a  
474 bona fide mechanism that prevented reversion to virulence by blocking reassortment with co-  
475 circulating field viruses. Due to the genetic backbone of bat-IAV, bat-chimeric viruses cannot reassort  
476 with conventional influenza viruses from birds and non-bat mammals (Ciminski et al., 2017;  
477 Juozapaitis et al., 2014; Ma et al., 2015), thereby preventing reversion to virulence. This is in fact a  
478 safety feature of future MLVs based on such bat-IAV chimeras. On the other hand, MHC class II has  
479 recently been identified to act as a receptor for bat-IAV through interaction with its HA protein. The  
480 broad binding capacities to MHC class II of various mammalian species has raised concerns for its  
481 zoonotic potential (Karakus et al., 2019). However, in our studies, the potential factor for zoonotic  
482 susceptibility (the authentic bat-IAV HA), was replaced by the subtype H1av of swIAV origin with  
483 restricted binding preferences for sialic acid receptors.



484 These findings suggest that even if infection levels are significantly reduced by an antigenically  
485 matched vaccine, thereby slowing both the dissemination of the virus through a herd and the generation  
486 time for naive contact pigs, transmission to naive animals may not be entirely interrupted. These  
487 findings are in agreement with those from previous reports indicating that vaccines are able to  
488 significantly limit nasal shedding, irrespective of the vaccine platform used, may delay viral  
489 transmission to naive pigs in direct contact and may also decrease the likelihood of indirect  
490 transmission (Loving et al., 2013; Ryt-Hansen et al., 2019), presumably by lowering viral load in the  
491 environment.

492 Based on the apparently stable backbone of the chimeric candidates tested, HA and NA genome  
493 segments of further antigenically differentiable swIAV lines (H1huN2, HpdmN1, H3N2) could be  
494 generated by reverse genetics. Testing whether multi-(tetra)valent *ts*-MLV induces a balanced and  
495 robust protective immune response, similar to the licensed quadrivalent *ts* vaccine for humans, in safety  
496 and vaccination-challenge studies in pigs would be desirable.

497

## 498 **Material and Methods**

### 499 **Virus origin and cell culture propagation**

#### 500 *Parental swIAV*

501 SwIAV parental (wild-type) strains were recruited from the study by Henritzi et al. (2020).  
502 Representative isolates of three virus lineages currently circulating in European domestic pig  
503 populations were selected. These included H1avN1 (A/swine/Germany/AR1670/2014, abbr. 1670),  
504 H1pdmN2 (A/swine/Germany/R541/2012, abbr. 541), and H3N2 (A/swine/Netherlands/AR531/2015,  
505 abbr. 531). These viruses were propagated in Madin-Darby canine kidney cells (Madin et al., 1958)  
506 (MDCK-II, FLI Collection of Cell Lines in Veterinary Medicine CCLV-RIE 1061) in Eagle's Minimal  
507 Essential Medium (MEM) supplemented with 10,000 U/ml Penicillin-Streptomycin (Thermo Fisher  
508 Scientific, Germany) and 2 µg/ml L-1-Tosylamide-2-phenylethyl-chloromethyl-ketone (TPCK)-  
509 treated trypsin (Sigma-Aldrich, USA). Viral infectivity titers were measured in MDCK-II cells in 96-  
510 well plates, which were incubated for three to five days at 37°C in a 5% CO<sub>2</sub> atmosphere. Induction of  
511 cytopathic effects (CPE) was examined natively. In addition, viral antigen was visualized using an  
512 immunoperoxidase monolayer assay (IPMA) as previously detailed (Postel et al., 2011). Briefly, cells  
513 were heat-fixated in 96-well plates and a sandwich assay with NP-specific monoclonal antibody H16-  
514 L10-4R5 ([www.atcc.org](http://www.atcc.org)) and a peroxidase-coupled goat anti-mouse IgG HRP polyclonal antibody

515 (Bio-Rad Laboratories GmbH, Germany) was carried out. 3-amino-9-ethylcarbazol (3-AEC; Sigma  
516 Aldrich, Germany) was used as a chromogen. TCID<sub>50</sub> titers were calculated according to Kärber  
517 (1931).

#### 518 *Virulent viruses used as control and for challenge experiments*

519 The murine-adapted, virulent H1N1 strain A/Puerto Rico8/1934 [PR8] served as a positive control in  
520 mice inoculation experiments as it is known to induce clinically severe pneumonia with  
521 histopathological lesions in lungs of mice (Fukushi et al., 2011). For challenge of pigs, the  
522 (homologous) parental virus strain 1670 (H1avN1) was used.

#### 523 *Serial cold-passaging of swIAV*

524 Sixty serial passages of the three selected wild-type viruses were generated in parallel in MDCK-II  
525 cells, as well as in the immortalized porcine cell line “swine testicle” (ST, FLI Collection of Cell Lines  
526 in Veterinary Medicine CCLV-RIE 0606), respectively. As the passages progressed, the incubation  
527 temperature was gradually lowered from 37°C to 33°C and finally to 28°C. Similarly, the inoculation  
528 dose was gradually reduced from 1 mL supernatant of the previous passage to 100 and 10 µL for a 25  
529 cm<sup>2</sup> cell culture flask. Figure 2 provides details of the passage history. The identity of HA and NA  
530 subtypes during serial cold passages (cp) was confirmed every 10 passages by subtype-specific  
531 tetraplex real-time PCRs [RT-qPCR] as described by Henritzi et al. (2016). To obtain information on  
532 the frequency of reversion to the thermophilic phenotype, the cp candidates were subsequently cultured  
533 ten times at 37°C in cell culture.

#### 534 *Bat IAV*

535 Ch-bt IAV were generated by the eight-plasmid reverse-genetics system described by Juozapaitis et al.  
536 (2014). In short, eight pHW2000 plasmids encoding all viral segments were transfected into HEK 293T  
537 cells using Lipofectamine 2000 (Thermo Scientific). Plaque assays of viral rescue supernatants were  
538 performed on MDCK-II cells to generate single plaques used for further stock generation on MDCK-  
539 II cells, in case of the NS-wt virus, or MDCK-NS1-NPro cells, in case of the NS1-2x virus. TPCK-  
540 treated trypsin (1µg/ml) was added to viral growth medium to allow multicycle replication of the  
541 viruses. Correct introduction of the NS1 mutations was verified via cDNA synthesis of viral RNA  
542 using the One-Step RT-PCR kit (Qiagen, Hilden, Germany), amplification and sequencing using NS-  
543 specific primers. For viral growth kinetics, MDCK-II, ST, and MDCK-NS1-Npro cells were infected

544 with the indicated viruses at a MOI of 0.001. Supernatant was harvested at the indicated timepoints  
545 and viral titers were determined via plaque assay.

546

## 547 **Molecular investigations**

### 548 *Construction of chimeric-bat IAV*

549 Two reassortment-incompetent ch-bt IAV were generated as shown in Figure 2. The parental swIAV  
550 isolate A/swine/Germany/AR1670/2014 (H1avN1) served as donor of the HA and NA segments which  
551 were flanked by authentic 5' and 3' sequences of A/little yellow-shouldered bat/Guatemala/164/2009  
552 (H17N10) as described by Juozapaitis et al. (2014). The resulting chimera, H17-1670, harbored six  
553 unmodified internal segments of the H17N10. The second chimera, H17-1670-NS1-2x, consisted of  
554 five unmodified internal segments of the H17N10 bt IAV. Its NS segment was mutated to express the  
555 amino acid substitutions R39A and K42A. These mutations are supposed to attenuate the original  
556 H17N10 bt-IAV due to structural changes in the RNA binding domain of the NS-1 protein (Turkington  
557 et al. 2015).

### 558 *Growth curve analyses*

559 Viral growth kinetics were compared in MDCK-II and ST cell cultures at 28 and 37°C. Triplicates of  
560 cell-free supernatants were collected at 0, 1, 2, 6, 10, 24, 48, and 72 hours post inoculation [hpi].  
561 TCID<sub>50</sub> values were determined as described above.

### 562 *Real time RT-PCR (RT-qPCR)*

563 Viral RNA was purified from clinical samples or cell culture supernatants with the QIAamp®Viral  
564 RNA Mini Kit (Qiagen, Hilden Germany) according to the manufacturer's instructions. TaqMan based  
565 RT-qPCRs were implemented using the AG-Path-One Step RT-PCR Kit (Ambion). Cycling was  
566 performed on a Bio-Rad CFX96 real-time PCR detection system (BioRad, Munich, Germany).  
567 Thermocycling conditions for the generic Matrix (M)-specific and HA/NA subtype-specific tetraplex  
568 RT-qPCRs (especially subtype H1avN1) were as described previously (Henritzi et al., 2016; Spackman  
569 et al., 2002).

### 570 *Conventional One-Step RT-PCR and Sanger sequencing*

571 The Superscript-III one step RT-PCR Kit with Platinum Taq polymerase (Invitrogen, Germany) was  
572 used for conventional RT-PCRs for each of the eight segments. Primers and optimized thermocycling  
573 conditions on an Analytik Jena Flex Cycler for full genome segment RT-PCRs are available on request.  
574 Size-separated amplicates were purified from agarose gels using the QIAquick Gel Extraction Kit  
575 (Qiagen, Hilden, Germany). Purified PCR products were used directly for cycle sequencing reactions  
576 (BigDye Terminator v3.1 Cycle Sequencing Kit, Applied Biosystems) which were purified using  
577 NucleoSEQ columns (Macherey-Nagel, Germany), and sequenced on ABI PRISM 3100 and 3130  
578 Genetic Analyzers (Life Technologies). Nucleotide sequences were curated and assembled using the  
579 Geneious software suite (Biomatters Ltd.) (Kearse et al., 2012).

#### 580 *Next and third generation sequencing – Illumina and MinION*

581 RNA was amplified with influenza-specific primers (Hoffmann et al., 2001) using Invitrogen  
582 Superscript III One-Step RT-PCR with Platinum Taq (ThermoFisher Scientific, Waltham, USA). The  
583 simultaneous amplification of all influenza segments is based on a one-step RT-PCR method along  
584 with primers designed to bind to the conserved 3' and 5' ends of the segments. After amplification,  
585 purification of the PCR products was executed with AMPure XP Magnetic Beads (Beckman Coulter,  
586 Fullerton, USA). Quantification was finally conducted with the NanoDrop™ 1000 Spectrophotometer  
587 (ThermoFisher Scientific). The library preparation for the MinION platform was accomplished with  
588 the Rapid Barcoding Kit (RBK-004, Oxford Nanopore Technology, Oxford, UK) following the  
589 manufacturer's instructions. Finally, mapping and consensus production of the quality checked and  
590 trimmed reads was conducted in the Geneious Software Suite (v11.1.5; Biomatters) with MiniMap2  
591 (Li, 2018), creating full genomes for all samples. Illumina sequencing was conducted by the company  
592 Eurofins according to their in-house NGSelect DNA protocol with fragmentation, adapter ligation with  
593 UDIs (unique dual indexing) producing up to 5 million paired reads of 150 bp in length. Mapping and  
594 consensus generation of the quality checked and trimmed reads was conducted in the Geneious  
595 Software Suite (v11.1.5; Biomatters) using Bowtie2.

596

#### 597 **Experimental animal infections**

598 *Ethics statement*

599 All animal experiments were approved by the State Office for Agriculture, Food Safety and Fishery in  
600 the Federal State of Mecklenburg-Western Pomerania, Germany: LALFF M-V 7221.3-1-030/19. All  
601 animals were kept under BSL-2 (cold-passaged swIAV) or BSL-3 (ch-bt IAV infections) conditions in  
602 the corresponding animal facilities at Friedrich-Loeffler-Institute (FLI), Germany.

603 All reverse genetically constructed chimeric viruses carrying gene segments of mammalian or avian  
604 influenza A viruses in the backbone of bat influenza A viruses were approved by the Regional Council  
605 of Baden-Württemberg, Germany; and the State Office for Health and Social Affairs of Mecklenburg-  
606 Western-Pomerania, Germany: SSI2-UNI.FRK.05.23/05.18/05.22 and LAGuS3021\_4/11.5.17.

### 607 *Animal origin*

608 In order to control possible host-specific influences on the course of the infection, a total of 120 SPF  
609 C57BL/6 mice from two different breeding lines were tested (from in-house breeding at FLI  
610 (Greifswald-Riems, Germany) and from Charles River Laboratories breeding (Research Models and  
611 Services GmbH, Sulzfeld, Germany). Further, in total 102 six-week old German landrace weaner pigs  
612 aged 10 weeks were obtained from a commercial high health status, swIAV-negative herd (BHZP-  
613 Basiszuchtbetrieb, Garlitz-Langenheide, Germany). All purchased pigs tested negative in nasal swabs  
614 for swIAV RNA and IAV nucleocapsid protein-specific antibodies in serum by RT-qPCR and ELISA  
615 (ID Screen® Influenza A Antibody Competition Multi-species, IDVET, Germany), respectively. For  
616 the mouse infections with the ch-bt IAV vaccine candidates, 10 SPF C57BL/6 mice were acquired  
617 from Janvier (Strasbourg, France).

### 618 *Experimental inoculation of mice*

619 Groups of eight 5-13-weeks-old C57BL/6 mice were anesthetized with isoflurane and inoculated  
620 intranasally with  $10^4$  TCID<sub>50</sub> of cp swIAV or their corresponding parental (par) viruses in a volume of  
621 40 µl (Deeg et al., 2017). One day post infection (dpi), four non-inoculated contact animals were co-  
622 housed. For 10 days, the body weights were measured daily and clinical observations recorded. Two  
623 days after infection, two inoculated animals were removed for histopathologic evaluation and antigen  
624 labeling using immunohistochemistry (IHC) in the lung and determination of viral loads in the nose  
625 and lung by RT-qPCR. All remaining animals were sacrificed at 10 dpi and viral loads were measured.  
626 Based on RT-qPCR results (cq value < 30), selected animals were examined for lung lesions and IHC  
627 was performed. For the infections with the ch-bt IAV, mice were anesthetized with a ketamine (100  
628 µg per g of body weight) and xylazine (5 µg per g of body weight) mixture. Inoculation was performed

629 intranasally with  $10^4$  PFU in 40  $\mu$ l PBS. The mice were sacrificed 3 dpi to harvest organs. Viral titers  
630 in lung and snouts of the infected mice were determined via plaque assay.

### 631 *Experimental inoculation of pigs*

#### 632 *Safety studies*

633 The clinical sequelae of experimental infections with either cp swIAV, ch-bt IAV or par swIAV were  
634 studied. Study designs were related to the specifications of the European Pharmacopoeia (Ph. Eur.,  
635 Monograph on Porcine Influenza Vaccine (inactivated); 01/2017:0963) where possible.

636 Eight pigs per virus were intranasally inoculated with  $10^6$  TCID<sub>50</sub> of the respective viruses in a volume  
637 of 2 ml (1 ml per nostril) using mucosal atomization devices [MAD] (Wolfe Tory Medical, USA). Two  
638 non-inoculated contact animals were associated at 1 dpi. At 4 dpi, all inoculated pigs were sacrificed  
639 for dissection of the respiratory tract. One day later (4 days post contact, dpc), the contact animals were  
640 autopsied. Clinical scores (according to parameters detailed in the appendix) and body temperature  
641 measurements were recorded daily. Nasal swabs were obtained at days 0, 2, and post mortem,  
642 respectively. During post mortems, nasal conchae, trachea, a bronchial swab (left lung), a  
643 bronchoalveolar lavage (right lung), lung tissues from seven locations, and tracheobronchial lymph  
644 node were recovered for examination of virus load by RT-qPCR and histopathological changes based  
645 on the protocol by Gauger et al. (2012) and immunohistochemical investigations (for details see  
646 appendix, supplemental methodology). In addition, blood samples were collected at day 0 and post  
647 mortem.

#### 648 *Challenge studies*

649 Protective effects of mucosal administration of ch-bt IAV were studied in challenge experiments  
650 commencing 21 days post inoculation (vaccination). Similarly to the procedures of the safety studies,  
651 vaccinated animals received  $10^6$  TCID<sub>50</sub> of the respective challenge viruses in a volume of 2 ml (1 ml  
652 per nostril) by MAD. On day 1 post challenge (dpch), each two non-inoculated contact animals were  
653 added to control challenge virus transmission. Nasal swabs were obtained at days 0, 2, and post  
654 mortem, respectively. At dpch 4 and 5, respectively, challenged and contact pigs were sacrificed and  
655 examined as described above.

656

#### 657 **Histopathology and immunohistochemistry**

658 Full autopsy was performed on all animals under BSL2 (cp viruses) or BSL3 (ch-bt IAV) conditions.  
659 For pigs, the lung, trachea and nose, for mice, the whole lung was collected and fixed in 10% neutral-  
660 buffered formalin. After trimming and paraffin-embedding, 2-3- $\mu$ m-thick sections were stained with  
661 hematoxylin and eosin (HE). Consecutive slides were processed for immunohistochemistry according  
662 to standardized procedures of avidin-biotin-peroxidase complex-method as described (Schwaiger et  
663 al., 2019). The primary antibody against the IAV was applied overnight at 4°C (ATCC clone HB-64,  
664 1:200 for pig tissues; rabbit anti-nucleoprotein serum 1:750 for mice tissues), the secondary  
665 biotinylated goat anti-mouse or anti-rabbit antibody was applied for 30 minutes at room temperature  
666 (Vector Laboratories, Burlingame, CA, USA, 1:200). Slides were scanned using Hamamatsu S60  
667 scanner, evaluation was performed using NDPview.2 plus software (Version 2.8.24, Hamamatsu  
668 Photonics, K.K. Japan). Evaluation and interpretation was following post examination masking  
669 approach (Meyerholz et al., 2018).

670 For mice, HE stained whole lung slides were evaluated for perivascular, peribronchiolar, and alveolar  
671 immune cell infiltrates as well as pneumonia-associated atelectasis, bronchiolar epithelial necrosis and  
672 regenerative hypertrophy/hyperplasia. All changes were recorded on ordinal scores using the tiers: 0 =  
673 no changes, or 1 = focal to oligofocal (<5% of the lung affected), 2 = multifocal (6-40%), 3= coalescing  
674 (41-80%), 4 = diffuse (>81%) changes. The sum of all values resulted in the pneumonia score. The  
675 distribution of viral antigen, four lung lobes were semi-quantitatively scored on an ordinal 0 to 4 scale:  
676 0 = negative; 1 = focal or oligofocal, 2 = multifocal, 3 = coalescing, and 4 = diffuse immunoreactive  
677 bronchiolar and alveolar epithelial cells, respectively. The sum of all values resulted in the antigen  
678 score.

679 For pigs, standardized histopathological evaluation of all lung lobes and tracheal sections was  
680 performed based on the protocol published by Gauger and colleagues (Gauger et al., 2012). In addition,  
681 viral antigen-associated nasal lesions were scored on a scale from 0 to 3 (score 1 = epithelial necrosis  
682 only; score 2 = epithelial necrosis and oligofocal ( $\leq 4$ ) rhinitis; score 3 = epithelial necrosis and  
683 multifocal ( $>4$ ) rhinitis). Positively stained sections were semiquantitatively investigated for the  
684 amount and distribution of viral antigen. The most affected area per organ (lung, trachea and nose) was  
685 selected and the number of positive cells was counted in 40x (0.1 mm<sup>2</sup>). Subsequently, the distribution  
686 pattern of positive areas of the section was determined with 1= focal (n=1), 2= oligofocal (n=2-4), 3=  
687 multifocal (n>4). The number of positive cells was then multiplied by the distribution score, which  
688 gave the final value. The following final values were assigned the respective scores in lung: score 1=

689 1-75; score 2= 76-150, score 3 >150. The scores in trachea and nose were assigned as follows: score  
690 1= 1-20, score 2= 21-40, score 3= >40. For subsequent analyses, the max values of all scores per organ  
691 were included.

692

### 693 *Statistics and illustration*

694 The two-tailed Mann-Whitney-test was used to calculate significance of differences between trial  
695 groups;  $p < 0.05$  was considered significant. Graphical illustrations were produced using GraphPad  
696 Prism version 9.0.0 for Windows (GraphPad Software, La Jolla, CA). Histopathology figures were  
697 created using Adobe Photoshop version CS5 (Adobe Systems Software Ireland Limited, Ireland).

698

### 699 **Acknowledgments**

700 The authors thank Aline Maksimov, Diana Parlow, Silvia Schuparis and Gabriele Czerwinski for  
701 outstanding technical assistance. For excellent care of animals and support during trials, we thank the  
702 animal keepers Steffen Kiepert, Christian Lipinski, Lukas Steinke, David Truschinski, Kerstin Kerstel,  
703 Frank Klipp, Doreen Fiedler, Ilona Bauernschäfer and necropsy assistants Ralf Redmer, Ralf Henkel  
704 and Christian Loth.

705

### 706 **Competing interests**

707 The authors declare that the research was conducted in the absence of any commercial or financial  
708 relationships that could be construed as a potential conflict of interest.

709

### 710 **Funding**

711 This study was funded by Ceva Santé Animale, Germany.

712

### 713 **Author Contributions**

714 Conceived and designed experiments: TCH, MB, MS, FD, AG, PPP, DH. Acquired animal samples:  
715 AG, TCH, PPP, JSE, AB. Sample processing: AG, PPP, JSE, DH, AB, JK, AP. Pathological and  
716 histological investigation: JSE, AB. Data analysis, statistics, figure design: AG, TCH, PPP, MS, JSE,  
717 DH, AB, JK, AP. Manuscript preparation: AG, TCH, JSE, AB, PPP, MS. All authors reviewed and  
718 approved the final version of the manuscript.

719

### 720 **Data availability**

721 All data generated or analysed during this study are included in the manuscript and supporting files.



722

723 **References**

- 724 Anderson, T.K., Macken, C.A., Lewis, N.S., Scheuermann, R.H., Van Reeth, K., Brown, I.H.,  
725 Swenson, S.L., Simon, G., Saito, T., Berhane, Y., Ciacci-Zanella, J., Pereda, A., Davis, C.T.,  
726 Donis, R.O., Webby, R.J., Vincent, A.L., 2016. A Phylogeny-Based Global Nomenclature  
727 System and Automated Annotation Tool for H1 Hemagglutinin Genes from Swine Influenza  
728 A Viruses. *mSphere* 1.
- 729 Anderson, T.K.C., J.; Arendsee, Z.W.; Venkatesh, D.; Souza, C.K.; Kimble, J.B.; Lewis, N.S.; Davis,  
730 C.T.; Vincent, A.L., 2021. Swine Influenza A Viruses and the Tangled Relationship with  
731 Humans. *Cold Spring Harb Perspect Med* 1.
- 732 Belshe, R.B., 2004. Current status of live attenuated influenza virus vaccine in the US. *Virus*  
733 *Research* 103, 177-185.
- 734 Broadbent, A.J., Santos, C.P., Godbout, R.A., Subbarao, K., 2014. The Temperature-Sensitive and  
735 Attenuation Phenotypes Conferred by Mutations in the Influenza Virus PB2, PB1, and NP  
736 Genes Are Influenced by the Species of Origin of the PB2 Gene in Reassortant Viruses  
737 Derived from Influenza A/California/07/2009 and A/WSN/33 Viruses. *Journal of Virology*  
738 88, 12339-12347.
- 739 Brockmeier, S.H., PG; Thacker, EL, 2002. Porcine Respiratory Disease Complex, Vol Chapter  
740 13ASM Press.
- 741 Brown, I.H., 2000. The epidemiology and evolution of influenza viruses in pigs. *Veterinary*  
742 *Microbiology* 74, 29-46.
- 743 Chan, W., Zhou, H., Kemble, G., Jin, H., 2008. The cold adapted and temperature sensitive influenza  
744 A/Ann Arbor/6/60 virus, the master donor virus for live attenuated influenza vaccines, has  
745 multiple defects in replication at the restrictive temperature. *Virology* 380, 304-311.
- 746 Chastagner, A., Enouf, V., Peroz, D., Herve, S., Lucas, P., Queguiner, S., Gorin, S., Beven, V.,  
747 Behillil, S., Leneveu, P., Garin, E., Blanchard, Y., van der Werf, S., Simon, G., 2019.  
748 Bidirectional Human-Swine Transmission of Seasonal Influenza A(H1N1)pdm09 Virus in  
749 Pig Herd, France, 2018. *Emerging Infectious Diseases* 25, 1940-1943.
- 750 Chauhan, R.P., Gordon, M.L., 2020. A Systematic Review Analyzing the Prevalence and Circulation  
751 of Influenza Viruses in Swine Population Worldwide. *Pathogens* 9.
- 752 Chen, Z.Y., Wang, W.J., Zhou, H., Suguitan, A.L., Shambaugh, C., Kim, L., Zhao, J., Kemble, G.,  
753 Jin, H., 2010. Generation of Live Attenuated Novel Influenza Virus A/California/7/09  
754 (H1N1) Vaccines with High Yield in Embryonated Chicken Eggs. *Journal of Virology* 84,  
755 44-51.
- 756 Chepkwony, S., Parys, A., Vandoorn, E., Chiers, K., Van Reeth, K., 2020. Efficacy of Heterologous  
757 Prime-Boost Vaccination with H3N2 Influenza Viruses in Pre-Immune Individuals: Studies in  
758 the Pig Model. *Viruses-Basel* 12.
- 759 Ciminski, K., Thamamongood, T., Zimmer, G., Schwemmler, M., 2017. Novel insights into bat  
760 influenza A viruses. *Journal of General Virology* 98, 2393-2400.
- 761 Deblanc, C., Herve, S., Gorin, S., Cador, C., Andraud, M., Queguiner, S., Barbier, N., Paboeuf, F.,  
762 Rose, N., Simon, G., 2018. Maternally-derived antibodies do not inhibit swine influenza virus

- 763 replication in piglets but decrease excreted virus infectivity and impair post-infectious  
764 immune responses. *Veterinary Microbiology* 216, 142-152.
- 765 Deblanc, C., Simon, G., 2017. Involvement of swine influenza A viruses in the porcine respiratory  
766 disease complex. *Virologie (Montrouge)* 21, 225-238.
- 767 Deeg, C.M., Hassan, E., Mutz, P., Rheinemann, L., Gotz, V., Magar, L., Schilling, M., Kallfass, C.,  
768 Nurnberger, C., Soubies, S., Kochs, G., Haller, O., Schwemmle, M., Staeheli, P., 2017. In  
769 vivo evasion of MxA by avian influenza viruses requires human signature in the viral  
770 nucleoprotein. *Cytokine* 100, 28-28.
- 771 Diaz, A., Marthaler, D., Culhane, M., Sreevatsan, S., Alkhamis, M., Torremorell, M., 2017.  
772 Complete Genome Sequencing of Influenza A Viruses within Swine Farrow-to-Wean Farms  
773 Reveals the Emergence, Persistence, and Subsidence of Diverse Viral Genotypes. *Journal of*  
774 *Virology* 91.
- 775 Everett, H., van Diemen, P.M., Aramouni, M., Ramsay, A., Coward, V.J., Pavot, V., Canini, L.,  
776 Holzer, B., Morgan, S.; Dynamics sLoLa Consortium, Woolhouse, M.E.J., Tchilian, E.,  
777 Brookes, S.M., Brown, I.H., Charleston, B., Gilbert, S., 2021. Vaccines That Reduce Viral  
778 Shedding Do Not Prevent Transmission of H1N1 Pandemic 2009 Swine Influenza A Virus  
779 Infection to Unvaccinated Pigs. *J Virol* 28;95(4):e01787-20. doi: .
- 780 Everett, H.E., Aramouni, M., Coward, V., Ramsay, A., Kelly, M., Morgan, S., Tchilian, E., Canini,  
781 L., Woolhouse, M.E.J., Gilbert, S., Charleston, B., Brown, I.H., Brookes, S.M., 2019.  
782 Vaccine-mediated protection of pigs against infection with pandemic H1N1 2009 swine  
783 influenza A virus requires a close antigenic match between the vaccine antigen and challenge  
784 virus. *Vaccine* 37, 2288-2293.
- 785 Fachinger, V., Bischoff, R., Ben Jedidia, S., Saalmuller, A., Elbers, K., 2008. The effect of  
786 vaccination against porcine circovirus type 2 in pigs suffering from porcine respiratory  
787 disease complex. *Vaccine* 26, 1488-1499.
- 788 Fukushi, M., Ito, T., Oka, T., Kitazawa, T., Miyoshi-Akiyama, T., Kirikae, T., Yamashita, M., Kudo,  
789 K., 2011. Serial Histopathological Examination of the Lungs of Mice Infected with Influenza  
790 A Virus PR8 Strain. *PLoS One* 6.
- 791 Gauger, P.C., Vincent, A.L., Loving, C.L., Henningson, J.N., Lager, K.M., Janke, B.H., Kehrli, M.E.,  
792 Roth, J.A., 2012. Kinetics of Lung Lesion Development and Pro-Inflammatory Cytokine  
793 Response in Pigs With Vaccine-Associated Enhanced Respiratory Disease Induced by  
794 Challenge With Pandemic (2009) A/H1N1 Influenza Virus. *Veterinary Pathology* 49, 900-  
795 912.
- 796 Genzow, M., Goodell, C., Kaiser, T.J., Johnson, W., Eichmeyer, M., 2018. Live attenuated influenza  
797 virus vaccine reduces virus shedding of newborn piglets in the presence of maternal antibody.  
798 *Influenza and Other Respiratory Viruses* 12, 353-359.
- 799 Hass, J., Matuszewski, S., Cieslik, D., Haase, M., 2011. The role of swine as "mixing vessel" for  
800 interspecies transmission of the influenza A subtype H1N1: A simultaneous Bayesian  
801 inference of phylogeny and ancestral hosts. *Infection Genetics and Evolution* 11, 437-441.
- 802 He, W., Wang, W., Han, H.M., Wang, L., Zhang, G., Gao, B., 2013. Molecular Basis of Live-  
803 Attenuated Influenza Virus. *PLoS One* 8.
- 804 Henritzi, D., Petric, P.P., Lewis, N.S., Graaf, A., Pessia, A., Starick, E., Breithaupt, A., Strebelow,  
805 G., Luttermann, C., Parker, L.M.K., Schroder, C., Hammerschmidt, B., Herrler, G., Beilage,

- 806 E.G., Stadlbauer, D., Simon, V., Krammer, F., Wacheck, S., Pesch, S., Schwemmler, M., Beer,  
807 M., Harder, T.C., 2020. Surveillance of European Domestic Pig Populations Identifies an  
808 Emerging Reservoir of Potentially Zoonotic Swine Influenza A Viruses. *Cell Host & Microbe*  
809 28, 614-+.
- 810 Henritzi, D., Zhao, N., Starick, E., Simon, G., Krog, J.S., Larsen, L.E., Reid, S.M., Brown, I.H.,  
811 Chiapponi, C., Foni, E., Wacheck, S., Schmid, P., Beer, M., Hoffmann, B., Harder, T.C.,  
812 2016. Rapid detection and subtyping of European swine influenza viruses in porcine clinical  
813 samples by haemagglutinin- and neuraminidase-specific tetra- and triplex real-time RT-PCRs.  
814 *Influenza and Other Respiratory Viruses* 10, 504-517.
- 815 Isakova-Sivak, I., Chen, L.M., Matsuoka, Y., Voeten, J.T.M., Kiseleva, I., Heldens, J.G.M., van den  
816 Bosch, H., Klimov, A., Rudenko, L., Cox, N.J., Donis, R.O., 2011. Genetic bases of the  
817 temperature-sensitive phenotype of a master donor virus used in live attenuated influenza  
818 vaccines: A/Leningrad/134/17/57 (H2N2). *Virology* 412, 297-305.
- 819 Juozapaitis, M., Moreira, E.A., Mena, I., Giese, S., Riegger, D., Pohlmann, A., Hoper, D., Zimmer,  
820 G., Beer, M., Garcia-Sastre, A., Schwemmler, M., 2014. An infectious bat-derived chimeric  
821 influenza virus harbouring the entry machinery of an influenza A virus. *Nature*  
822 *Communications* 5.
- 823 Karakus, U., Thamamongood, T., Ciminski, K., Ran, W., Gunther, S.C., Pohl, M.O., Eletto, D.,  
824 Jeney, C., Hoffmann, D., Reiche, S., Schinkothe, J., Ulrich, R., Wiener, J., Hayes, M.G.B.,  
825 Chang, M.W., Hunziker, A., Yanguez, E., Aydilto, T., Krammer, F., Oderbolz, J., Meier, M.,  
826 Oxenius, A., Halenius, A., Zimmer, G., Benner, C., Hale, B.G., Garcia-Sastre, A., Beer, M.,  
827 Schwemmler, M., Stertz, S., 2019. MHC class II proteins mediate cross-species entry of bat  
828 influenza viruses. *Nature* 567, 109-+.
- 829 Kärber, G., 1931. Beitrag zur kollektiven Behandlung pharmakologischer Reihenversuche. . *Naunyn-*  
830 *Schmiedebergs Archiv für experimentelle Pathologie und Pharmakologie* 162(4):480–3.
- 831 Kearse, M., Moir, R., Wilson, A., Stones-Havas, S., Cheung, M., Sturrock, S., Buxton, S., Cooper,  
832 A., Markowitz, S., Duran, C., Thierer, T., Ashton, B., Meintjes, P., Drummond, A., 2012.  
833 Geneious Basic: An integrated and extendable desktop software platform for the organization  
834 and analysis of sequence data. *Bioinformatics* 28, 1647-1649.
- 835 Krog, J.S., Hjulsager, C.K., Larsen, M.A., Larsen, L.E., 2017. Triple-reassortant influenza A virus  
836 with H3 of human seasonal origin, NA of swine origin, and internal A(H1N1) pandemic 2009  
837 genes is established in Danish pigs. *Influenza and Other Respiratory Viruses* 11, 298-303.
- 838 Lavelle, E.C., Ward, R.W., 2021. Mucosal vaccines - fortifying the frontiers (Aug, 2021,  
839 10.1038/s41577-021-00583-2). *Nature Reviews Immunology*.
- 840 Lee, J., Li, Y.H., Li, Y.H., Cino-Ozuna, A.G., Duff, M., Lang, Y.K., Ma, J.J., Sunwoo, S., Richt,  
841 J.A., Ma, W.J., 2021. Bat influenza vectored NS1-truncated live vaccine protects pigs against  
842 heterologous virus challenge. *Vaccine* 39, 1943-1950.
- 843 Li, H., 2018. Minimap2: pairwise alignment for nucleotide sequences. *Bioinformatics* 34, 3094-3100.
- 844 Loving, C.L., Lager, K.M., Vincent, A.L., Brockmeier, S.L., Gauger, P.C., Anderson, T.K., Kitikoon,  
845 P., Perez, D.R., Kehrli, M.E., 2013. Efficacy in Pigs of Inactivated and Live Attenuated  
846 Influenza Virus Vaccines against Infection and Transmission of an Emerging H3N2 Similar  
847 to the 2011-2012 H3N2v. *Journal of Virology* 87, 9895-9903.

- 848 Ma, W., Lager, K.M., Vincent, A.L., Janke, B.H., Gramer, M.R., Richt, J.A., 2009. The Role of  
849 Swine in the Generation of Novel Influenza Viruses. *Zoonoses and Public Health* 56, 326-  
850 337.
- 851 Ma, W.J., Garcia-Sastre, A., Schwemmle, M., 2015. Expected and Unexpected Features of the Newly  
852 Discovered Bat Influenza A-like Viruses. *Plos Pathogens* 11.
- 853 Madin, S.H., Darby, N.B., 1958. Established Kidney Cell Lines of Normal Adult Bovine and Ovine  
854 Origin. *Proceedings of the Society for Experimental Biology and Medicine* 98, 574-576.
- 855 Martinez-Sobrido, L., Peersen, O., Nogales, A., 2018. Temperature Sensitive Mutations in Influenza  
856 A Viral Ribonucleoprotein Complex Responsible for the Attenuation of the Live Attenuated  
857 Influenza Vaccine. *Viruses-Basel* 10.
- 858 Meyer, L., Sausset, A., Sedano, L., Da Costa, B., Le Goffic, R., Delmas, B., 2016. Codon Deletions  
859 in the Influenza A Virus PA Gene Generate Temperature-Sensitive Viruses. *Journal of*  
860 *Virology* 90, 3684-3693.
- 861 Meyerholz, D.K., Beck, A.P., 2018. Fundamental Concepts for Semiquantitative Tissue Scoring in  
862 Translational Research. *Ilar Journal* 59, 13-17.
- 863 Nelson, M.I., Vincent, A.L., Kitikoon, P., Holmes, E.C., Gramer, M.R., 2012. Evolution of Novel  
864 Reassortant A/H3N2 Influenza Viruses in North American Swine and Humans, 2009-2011.  
865 *Journal of Virology* 86, 8872-8878.
- 866 Neumann, G., Noda, T., Kawaoka, Y., 2009. Emergence and pandemic potential of swine-origin  
867 H1N1 influenza virus. *Nature* 459, 931-939.
- 868 Padilla-Quirarte, H.O., Lopez-Guerrero, D.V., Gutierrez-Xicotencatl, L., Esquivel-Guadarrama, F.,  
869 2019. Protective Antibodies Against Influenza Proteins. *Frontiers in Immunology* 10.
- 870 Pena, L., Vincent, A.L., Ye, J.Q., Ciacci-Zanella, J.R., Angel, M., Lorusso, A., Gauger, P.C., Janke,  
871 B.H., Loving, C.L., Perez, D.R., 2011. Modifications in the Polymerase Genes of a Swine-  
872 Like Triple-Reassortant Influenza Virus To Generate Live Attenuated Vaccines against 2009  
873 Pandemic H1N1 Viruses. *Journal of Virology* 85, 456-469.
- 874 Petukhova, G.D., Losev, I.V., Isakova-Sivak, I.N., Rudenko, L.G., 2017. Influence of Individual  
875 Mutations in Genes Coding Internal Proteins of the Influenza A Virus on Formation of  
876 Humoral and Cellular Immune Response in Mice. *Molecular Genetics Microbiology and*  
877 *Virology* 32, 160-167.
- 878 Pirolo, M., Espinosa-Gongora, C., Bogaert, D., Guardabassi, L., 2021. The porcine respiratory  
879 microbiome: recent insights and future challenges. *Anim Microbiome* 3, 9.
- 880 Pollard, A.J., Bijker, E.M., 2021. A guide to vaccinology: from basic principles to new developments  
881 (Dec, 10.1038/s41577-020-00479-7, 2020). *Nature Reviews Immunology* 21, 129-129.
- 882 Postel, A., Letzel, T., Müller, F., Ehricht, R., Pourquier, P., Dauber, M., Grund, C., Beer, M., Harder,  
883 T.C., 2011. In vivo biotinylated recombinant influenza A virus hemagglutinin for use in  
884 subtype-specific serodiagnostic assays. *Analytical Biochemistry* 411, 22-31.
- 885 Rahn, J.H., D. Harder, T.C. Beer, M. Ibrahim, N. S., 2015. Vaccines against influenza A viruses in  
886 poultry and swine: Status and future developments. *Vaccine* 33, 2414-2424.
- 887 Rajao, D.S., Anderson, T.K., Gauger, P.C., Vincent, A.L., 2014. Pathogenesis and Vaccination of  
888 Influenza A Virus in Swine. *Influenza Pathogenesis and Control - Vol I* 385, 307-326.

- 889 Rajao, D.S., Perez, D.R., 2018. Universal Vaccines and Vaccine Platforms to Protect against  
890 Influenza Viruses in Humans and Agriculture. *Frontiers in Microbiology* 9.
- 891 Ren, C.C., Chen, Y.Y., Zhang, M., Zhang, T., Bao, D.Q., Lu, C.Y., Xue, R.X., Zhang, Y.J., Liu,  
892 W.H., Chen, H.J., Teng, Q.Y., Yang, J.M., Li, X.S., Li, Z.J., Liu, Q.F., 2019. Limited  
893 adaptation of chimeric H9N2 viruses containing internal genes from bat influenza viruses in  
894 chickens. *Veterinary Microbiology* 232, 151-155.
- 895 Rodriguez, L., Reedy, S., Nogales, A., Murcia, P.R., Chambers, T.M., Martinez-Sobrido, L., 2018.  
896 Development of a novel equine influenza virus live-attenuated vaccine. *Virology* 516, 76-85.
- 897 Rose, N., Herve, S., Eveno, E., Barbier, N., Eono, F., Dorenlor, V., Andraud, M., Camsusou, C.,  
898 Madec, F., Simon, G., 2013. Dynamics of influenza A virus infections in permanently  
899 infected pig farms: evidence of recurrent infections, circulation of several swine influenza  
900 viruses and reassortment events. *Veterinary Research* 44.
- 901 Ryt-Hansen, P., Pedersen, A.G., Larsen, I., Kristensen, C.S., Krog, J.S., Wacheck, S., Larsen, L.E.,  
902 2020. Substantial Antigenic Drift in the Hemagglutinin Protein of Swine Influenza A Viruses.  
903 *Viruses-Basel* 12.
- 904 Ryt-Hansen, P., Pedersen, A.G., Larsen, I., Krog, J.S., Kristensen, C.S., Larsen, L.E., 2019. Acute  
905 Influenza A virus outbreak in an enzootic infected sow herd: Impact on viral dynamics,  
906 genetic and antigenic variability and effect of maternally derived antibodies and vaccination.  
907 *PLoS One* 14.
- 908 Saade, G., Deblanc, C., Bougon, J., Marois-Crehan, C., Fablet, C., Auray, G., Belloc, C., Leblanc-  
909 Maridor, M., Gagnon, C.A., Zhu, J.Z., Gottschalk, M., Summerfield, A., Simon, G., Bertho,  
910 N., Meurens, F., 2020. Coinfections and their molecular consequences in the porcine  
911 respiratory tract. *Veterinary Research* 51.
- 912 Sandbulte, M.R., Spickler, A.R., Zaabel, P.K., Roth, J.A., 2015. Optimal Use of Vaccines for Control  
913 of Influenza A Virus in Swine. *Vaccines* 3, 22-73.
- 914 Schon, J., Ran, W., Gorka, M., Schwemmler, M., Beer, M., Hoffmann, D., 2020. A modified live bat  
915 influenza A virus-based vaccine prototype provides full protection against HPAIV H5N1. *Npj*  
916 *Vaccines* 5.
- 917 Schwaiger, T., Sehl, J., Karte, C., Schafer, A., Huhr, J., Mettenleiter, T.C., Schroder, C., Kollner, B.,  
918 Ulrich, R., Blohmid, U., 2019. Experimental H1N1pdm09 infection in pigs mimics human  
919 seasonal influenza infections. *PLoS One* 14.
- 920 Sharma, A., Zeller, M.A., Li, G.W., Harmon, K.M., Zhang, J.Q., Hoang, H., Anderson, T.K.,  
921 Vincent, A.L., Gauger, P.C., 2020. Detection of live attenuated influenza vaccine virus and  
922 evidence of reassortment in the US swine population. *Journal of Veterinary Diagnostic*  
923 *Investigation* 32, 301-311.
- 924 Short, K.R., M. Richard, J. H. Verhagen, D. van Riel, E. J. Schrauwen, J. M. van den, Brand, B.M.,  
925 R. Bodewes, and S. Herfst, 2015. One health, multiple challenges: The inter-species  
926 transmission of influenza A virus. *One health (Amsterdam, Netherlands)* 11-13.
- 927 Solorzano, A., Webby, R.J., Lager, K.M., Janke, B.H., Garcia-Sastre, A., Richt, J.A., 2005.  
928 Mutations in the NS1 protein of swine influenza virus impair anti-interferon activity and  
929 confer attenuation in pigs. *Journal of Virology* 79, 7535-7543.
- 930 Spackman, E., Senne, D.A., Myers, T.J., Bulaga, L.L., Garber, L.P., Perdue, M.L., Lohman, K.,  
931 Daum, L.T., Suarez, D.L., 2002. Development of a real-time reverse transcriptase PCR assay

- 932 for type A influenza virus and the avian H5 and H7 hemagglutinin subtypes. *Journal of*  
933 *Clinical Microbiology* 40, 3256-3260.
- 934 Sridhar, S., Brokstad, K.A., Cox, R.J., 2015. Influenza Vaccination Strategies: Comparing Inactivated  
935 and Live Attenuated Influenza Vaccines. *Vaccines (Basel)*. 3(2):PMID, 373-389.
- 936 Sun, H.L., Xiao, Y.H., Liu, J.Y., Wang, D.Y., Li, F.T., Wang, C.X., Li, C., Zhu, J.D., Song, J.W.,  
937 Sun, H.R., Jiang, Z.M., Liu, L.T., Zhang, X., Wei, K., Hou, D.J., Pu, J., Sun, Y.P., Tong, Q.,  
938 Bi, Y.H., Chang, K.C., Liu, S.D., Gao, G.F., Liu, J.H., 2020. Prevalent Eurasian avian-like  
939 H1N1 swine influenza virus with 2009 pandemic viral genes facilitating human infection.  
940 *Proceedings of the National Academy of Sciences of the United States of America* 117,  
941 17204-17210.
- 942 Townsend, H.G.G., Penner, S.J., Watts, T.C., Cook, A., Bogdan, J., Haines, D.M., Griffin, S.,  
943 Chambers, T., Holland, R.E., Whitaker-Dowling, P., Youngner, J.S., Sebring, R.W., 2001.  
944 Efficacy of a cold-adapted, intranasal, equine influenza vaccine: challenge trials. *Equine*  
945 *Veterinary Journal* 33, 637-643.
- 946 Van Reeth, K., Ma, W.J., 2013. Swine Influenza Virus Vaccines: To Change or Not to Change-That's  
947 the Question. *Swine Influenza* 370, 173-200.
- 948 Vincent, A., Awada, L., Brown, I., Chen, H., Claes, F., Dauphin, G., Donis, R., Culhane, M.,  
949 Hamilton, K., Lewis, N., Mumford, E., Nguyen, T., Parchariyanon, S., Pasick, J., Pavade, G.,  
950 Pereda, A., Peiris, M., Saito, T., Swenson, S., Van Reeth, K., Webby, R., Wong, F., Ciacci-  
951 Zanella, J., 2014. Review of Influenza A Virus in Swine Worldwide: A Call for Increased  
952 Surveillance and Research. *Zoonoses and Public Health* 61, 4-17.
- 953 Vincent, A.L., Ma, W., Lager, K.M., Janke, B.H., Webby, R.J., Garcia-Sastre, A., Richt, E.A., 2007.  
954 Efficacy of intranasal administration of a truncated NS1 modified live influenza virus vaccine  
955 in swine. *Vaccine* 25, 7999-8009.
- 956 Vincent, A.L., Ma, W.J., Lager, K.M., Janke, B.H., Richt, J.A., 2008. Swine Influenza Viruses: A  
957 North American Perspective. *Advances in Virus Research*, Vol 72 72, 127-154.
- 958 Vincent, A.L.P., D.R.; Rajao, D.; Anderson, T.K.; Abente, E.I.; Walia R.R.; Lewis N.S., 2017.  
959 Influenza A virus vaccines for swine. *Veterinary Microbiology* 206, 35-44.
- 960 Webster, R.G., 1997. Influenza virus: transmission between species and relevance to emergence of  
961 the next human pandemic. *Archives of Virology*, 105-113.
- 962 Yang, J.M., Lee, J., Ma, J.J., Lang, Y.K., Nietfeld, J., Li, Y.H., Duff, M., Li, Y.H., Yang, Y.J., Liu,  
963 H.X., Zhou, B., Wentworth, D.E., Richt, J.A., Li, Z.J., Ma, W.J., 2017. Pathogenicity of  
964 modified bat influenza virus with different M genes and its reassortment potential with swine  
965 influenza A virus. *Journal of General Virology* 98, 577-584.
- 966 Zhou, B., Li, Y., Halpin, R., Hine, E., Spiro, D.J., Wentworth, D.E., 2011. PB2 Residue 158 Is a  
967 Pathogenic Determinant of Pandemic H1N1 and H5 Influenza A Viruses in Mice. *Journal of*  
968 *Virology* 85, 357-365.
- 969 Zhou, B., Ma, J.J., Liu, Q.F., Bawa, B., Wang, W., Shabman, R.S., Duff, M., Lee, J., Lang, Y.K.,  
970 Cao, N., Nagy, A., Lin, X.D., Stockwell, T.B., Richt, J.A., Wentworth, D.E., Ma, W.J., 2014.  
971 Characterization of Uncultivable Bat Influenza Virus Using a Replicative Synthetic Virus.  
972 *Plos Pathogens* 10.

973 **Table 1.** Characteristics of selected virus isolates and strains used for serial cold passaging in cell culture, for generation of chimeric-bt IAV by reverse  
 974 genetics (*rg*) and for inoculation and challenge experiments in mice and pigs.

975 \*MDCK-II – Madin Darby canine kidney cell; ST- swine testicle cell; nd – not defined

976 \*\* Reversion to cytopathic virus replication after ten blind passages at 37°

| Isolate-ID                                           | Subtype            | Parental virus | Cell line         | Passage | Vaccine candidate       | Reversion to thermophilic growth ** |
|------------------------------------------------------|--------------------|----------------|-------------------|---------|-------------------------|-------------------------------------|
| A/swine/Netherlands/AR531/2015                       | H3N2               | par531         | MDCK-II           | 60      | cp531                   | -                                   |
|                                                      |                    |                | ST                |         |                         | -                                   |
| A/swine/Germany/R541/2012                            | H1pdmN2            | par541         | MDCK-II           | 60      | cp541                   | +                                   |
|                                                      |                    |                | ST                |         |                         | +                                   |
| A/swine/Germany/AR1670/2014                          | H1avN1             | par1670        | MDCK-II           | 60      | cp1670MDCK<br>cp 1670ST | +                                   |
|                                                      |                    |                | ST                |         |                         | +                                   |
| A/swine/Germany/AR1670/2014                          | H1avN1<br>+ H17N10 | par1670        | MDCK-II           | rg      | H17-1670                | nd                                  |
| A/little yellow<br>shouldered bat/Guatemala/164/2009 |                    |                | MDCK-NS1-<br>Npro | rg      | H17-1670-<br>NS1-2x     | nd                                  |

977

**Modified live attenuated vaccine against swine Influenza A Virus**

978 **Table 2.** Non-synonymous mutations of serially cold-passaged swIAV isolates 531 (H3N2), 541 (H1pdmN2), and 1670 (H1avN1) of passage 60 in  
 979 ST or MDCK-II cell cultures compared to the corresponding low passage parental virus isolate replicated in MDCK-II cells at 37°C. Colors indicate  
 980 parallel arising amino acid substitutions after cold passaging in both ST and MDCK-II cell cultures.

981 \*id- identical to the parental virus

| Isolat                     | Zelllinie | Passage | PB1             | PB2                                  | PA                                 | HA              | NP                                            | NA | M              | NS            |
|----------------------------|-----------|---------|-----------------|--------------------------------------|------------------------------------|-----------------|-----------------------------------------------|----|----------------|---------------|
| <b>ts541<br/>(H1pdmN2)</b> | ST        | 60      | G663L           | E18G                                 | K18N                               | id              | id                                            | id | T167I          | L166F         |
| <b>ts531 (H3N2)</b>        | ST        | 60      | I301M;<br>I681V | <b>D87G</b> ; K443R;<br>V730I; Q748L | id                                 | K254E;<br>I351K | Y10H; G490N;<br>N492P                         | id | A22T;<br>V315F | G28S;<br>G45N |
|                            | ST        | 60      | id              | S78R; <b>E158G</b>                   | Y48C;<br>D234N;<br>E444D;<br>V542I | id              | id                                            | id | D89E           | id            |
| <b>ts1670<br/>(H1avN1)</b> | MDCK-II   | 60      | id              | I63R; <b>E158G</b> ;<br>R630K        | R184M                              | id              | V33D;<br>V66G;G93V;<br>D114M; R120L;<br>A131V | id | id             | id            |

982



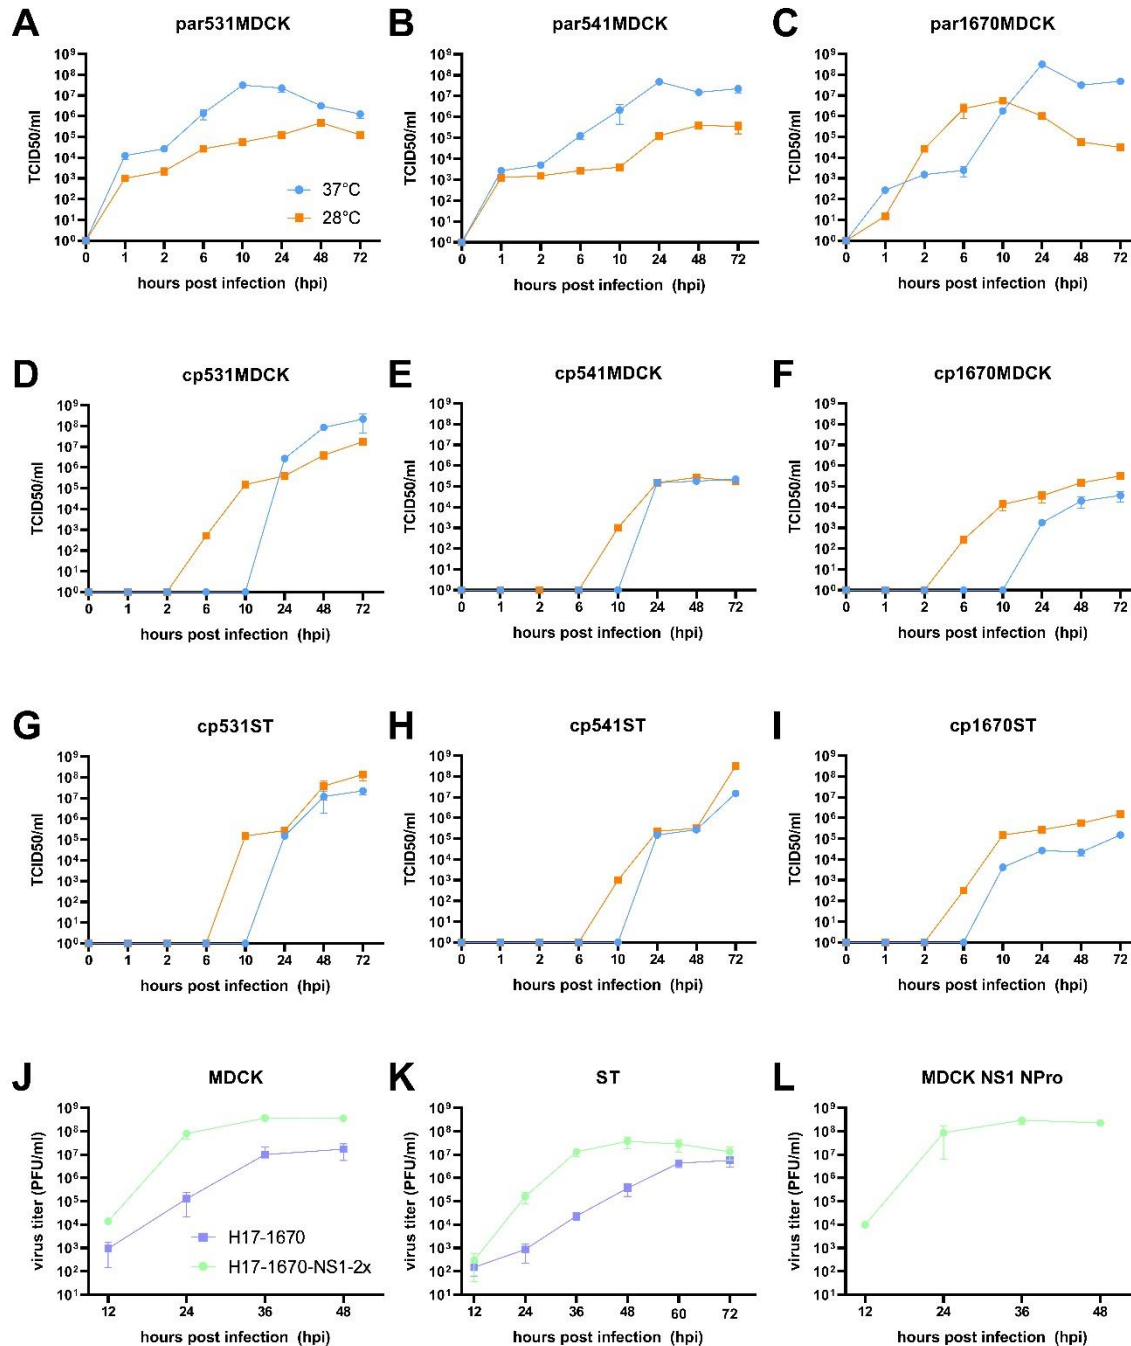

983

984 **Figure 1.** Growth kinetics of parental swIA viruses (A-C), cold-passaged isolates thereof after 60 serial  
 985 passages in (D-F) MDCK-II or (G-I) ST-0606 cell culture at 37°C (blue) versus 28°C (orange) and  
 986 growth kinetics on (J) MDCK-II, (K) ST-0606 and (L) MDCK-NS1-NPro cell cultures infected with  
 987 ch-bt IAV candidates H17-1670 (purple) and H17-1670-NS1-2x (green).  
 988 Mean values were calculated for each virus from three independent biological replicates.

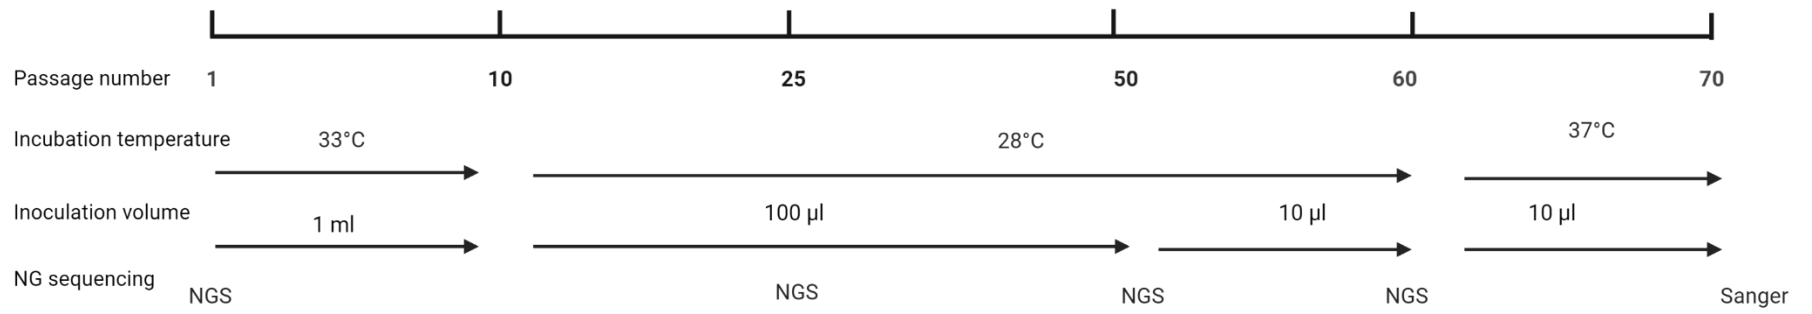

989

990 **Figure 2.** Scheme of the *in vitro* generation of serially cold passaged swine Influenza A viruses.

# H17-1670

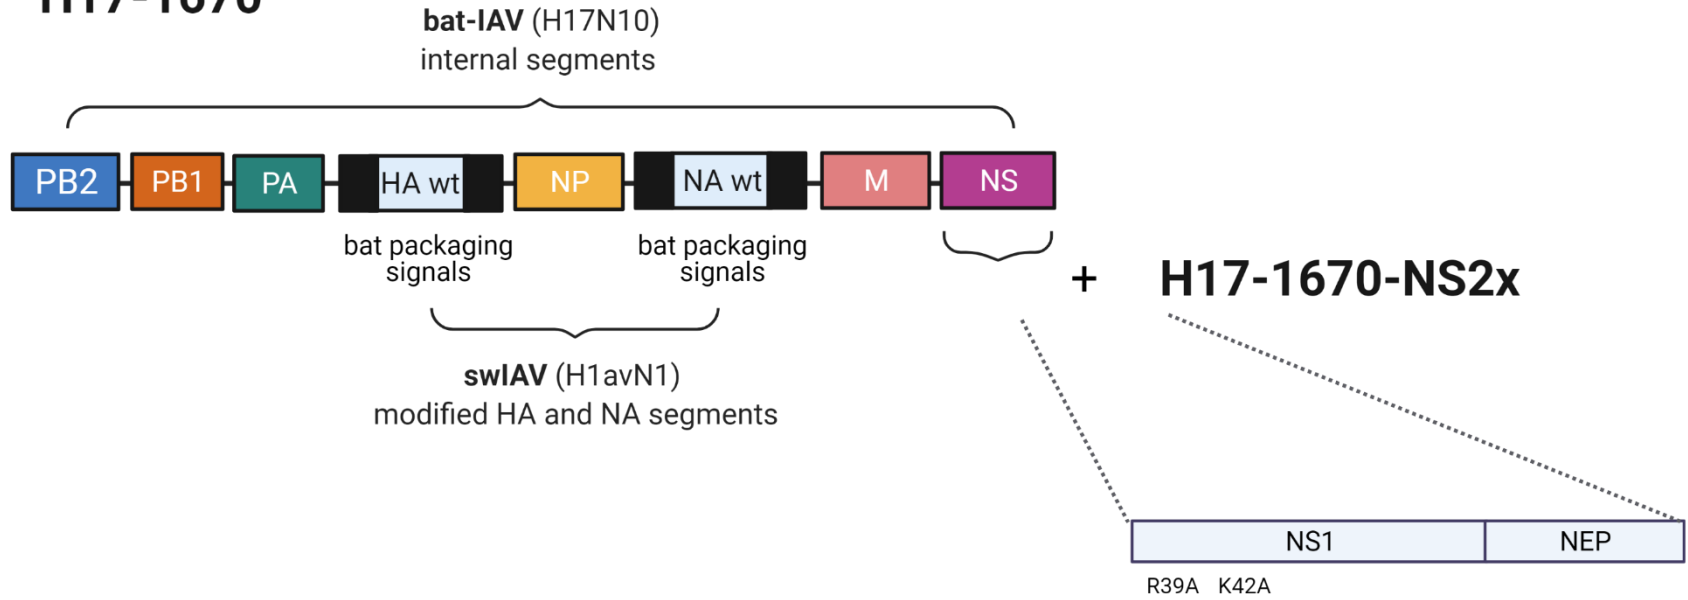

991

992 **Figure 3.** Genome organization of chimeric-bat-swine (HA, NA) influenza A viruses.

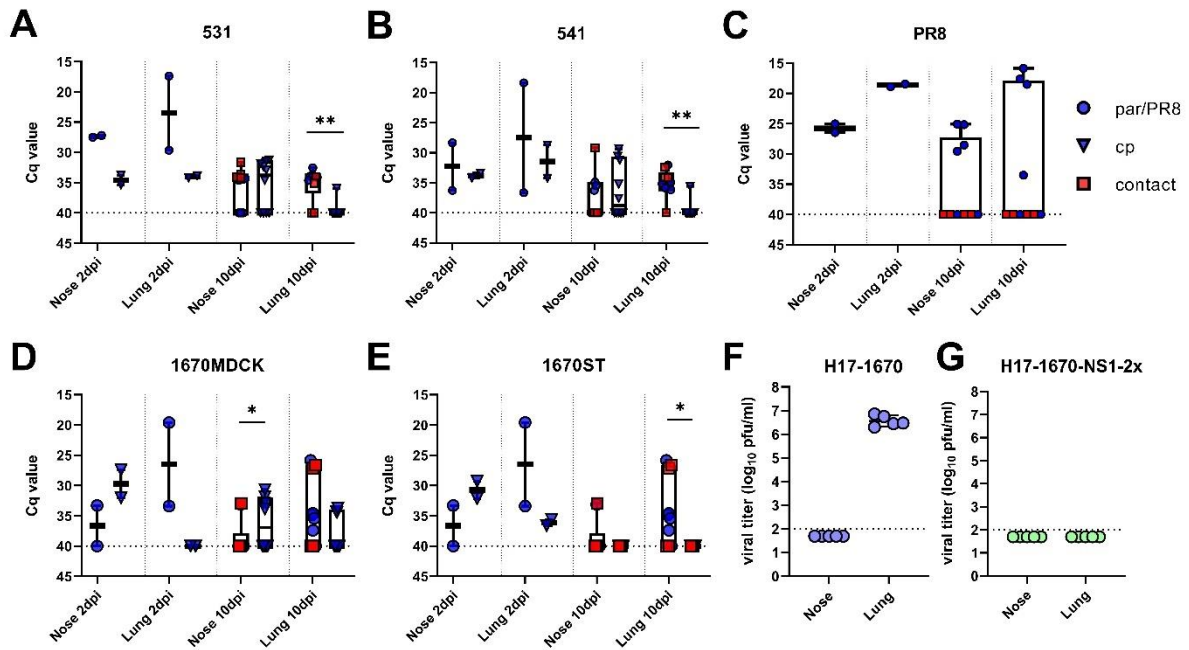

993

994 **Figure 4.** (A-E) Viral loads measured by RT-qPCR in nasal and lung tissues after inoculation  
995 of the different parental (par, rounded blue dots), cold-passaged (cp, blue triangles) swIAV or  
996 positive control (PR8) in C57BL/6 mice. Red squares indicated non-inoculated contact animals.  
997 (F-G) Viral titers measured by plaque assays in nasal and lung tissues after inoculation of  
998 C57BL/6 mice with ch-bt IAV candidates H17-1670 (purple) and H17-1670-NS1-2x (blue).  
999 \*\_\*\*\* indicate significance levels ( $p < 0.05$ ;  $< 0.01$ ;  $< 0.001$ )

# Modified live attenuated vaccine against swine Influenza A Virus

bioRxiv preprint doi: <https://doi.org/10.1101/2022.06.20.496807>; this version posted June 20, 2022. The copyright holder for this preprint (which was not certified by peer review) is the author/funder. All rights reserved. No reuse allowed without permission.

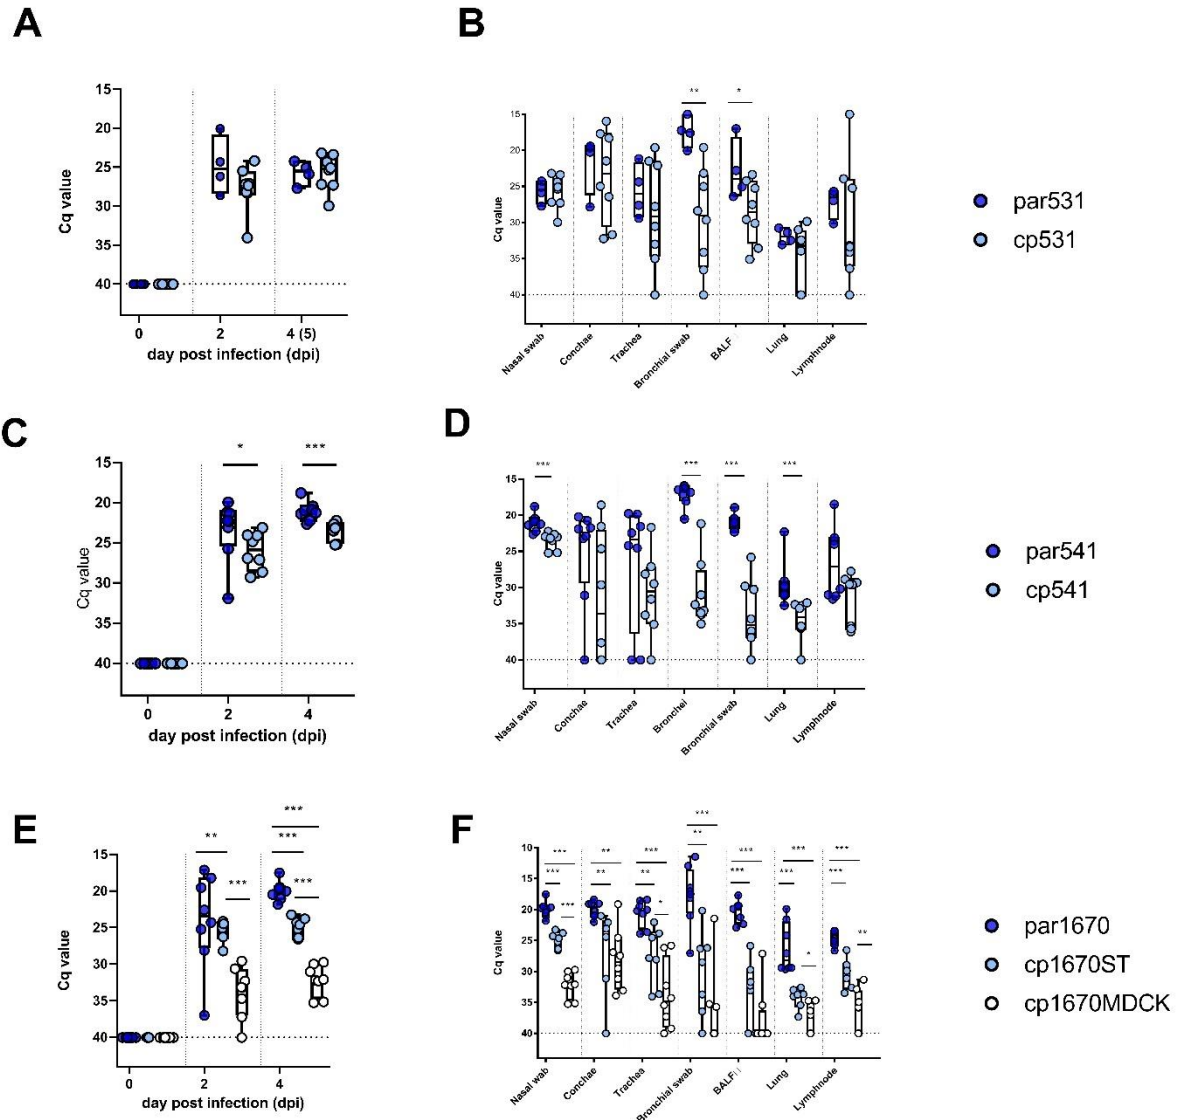

1000

1001 **Figure 5.** Nasal viral excretion (A, C, E) and viral loads in respiratory tissues (B, D, F) of pigs  
 1002 inoculated with (A, B) H3N2 cold passed mutant 531 [cp531] or H3N2 parental virus  
 1003 [par531], (C, D) H1pdmN2 cold passed mutant 541 [cp541] or H1pdmN2 parental virus  
 1004 [par541], and (E, F) H1avN1 cold passed mutants 1670 ST [cp1670ST] and 1670 MDCK-II  
 1005 [cp1670MDCK-II] or H1avN1 parental virus [par1670], respectively.

1006 \*\_\*\*\* indicate significance levels ( $p < 0.05$ ;  $< 0.01$ ;  $< 0.001$ )

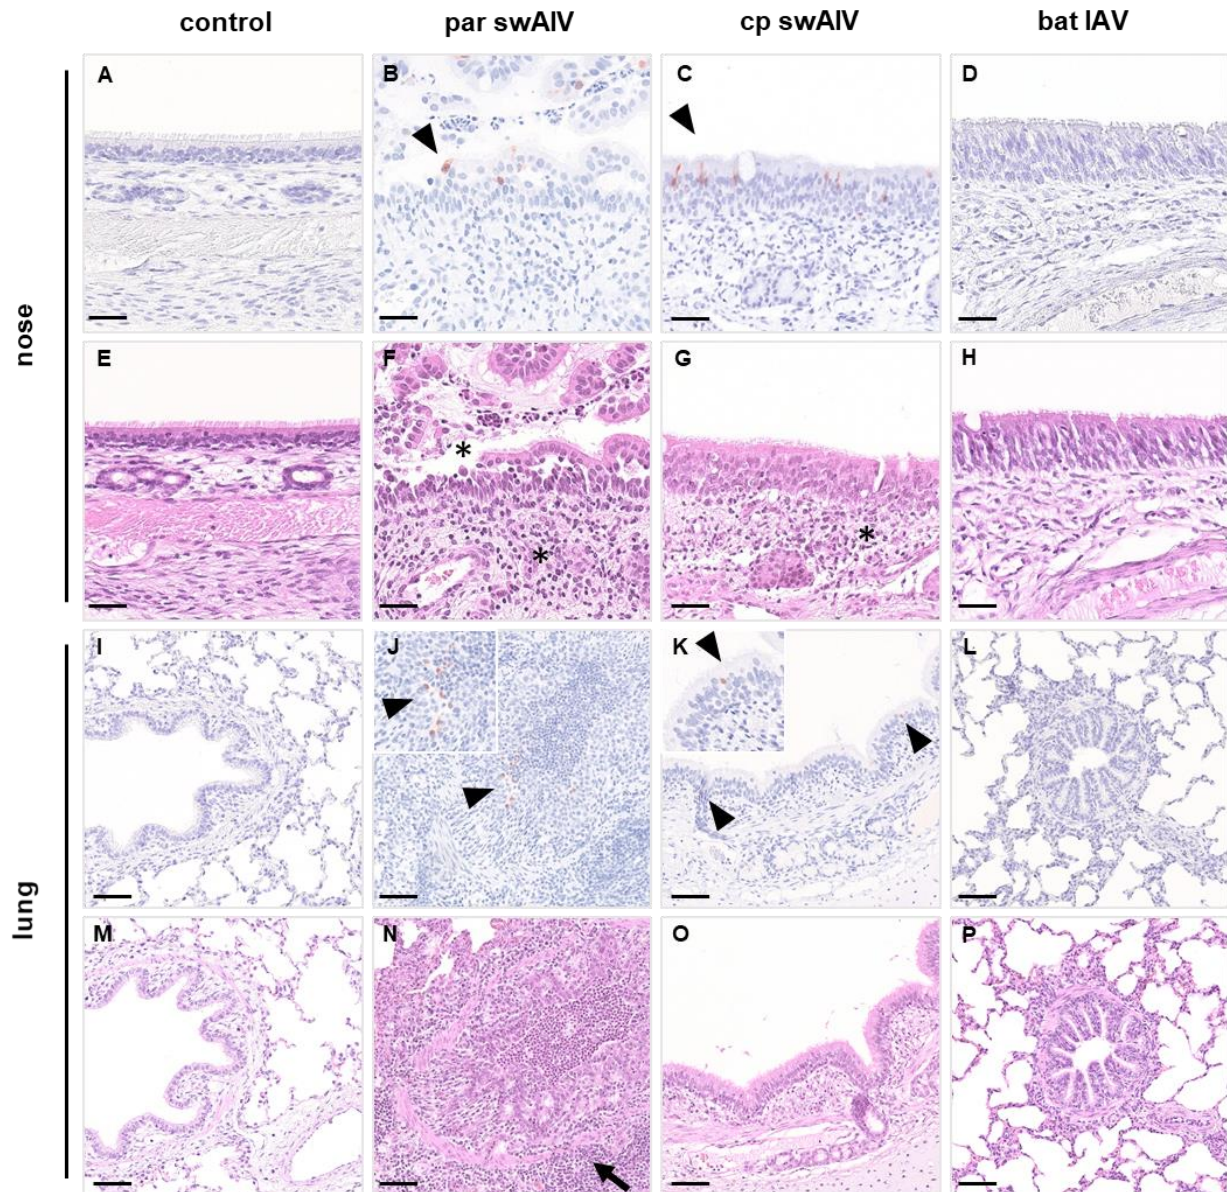

1007

1008 **Figure 6.** Representative histopathology and immunohistochemistry of the nose (A-D, IHC  
 1009 labeling; E-H, HE staining) and lung (I-L, IHC labeling; M-P HE staining) of control animals  
 1010 compared to pigs infected with par swIAV, cp swIAV or bat IAV. Antigen positive cells of the  
 1011 nose (B, C). bronchi and bronchioles (J-K) are indicated by arrowheads, insets demonstrate  
 1012 magnification of positive cells. Epithelial necrosis and immune cell infiltration of the nasal  
 1013 mucosa is shown by asterisk (F-G). Necrotizing bronchiolitis with peribronchiolar lymphocytic  
 1014 cuffing is highlighted by arrow (N). HE, Hematoxylin and eosin staining. IHC  
 1015 immunohistochemistry, Avidin-biotin-complex method, 3-amino-9-ethylcarbazole chromogen  
 1016 (red), hematoxylin counterstain (blue). Bars represent 50  $\mu$ m (A-H) and 100 $\mu$ m (I-P).

# Modified live attenuated vaccine against swine Influenza A Virus

bioRxiv preprint doi: <https://doi.org/10.1101/2022.06.20.496807>; this version posted June 20, 2022. The copyright holder for this preprint (which was not certified by peer review) is the author/funder. All rights reserved. No reuse allowed without permission.

**A**

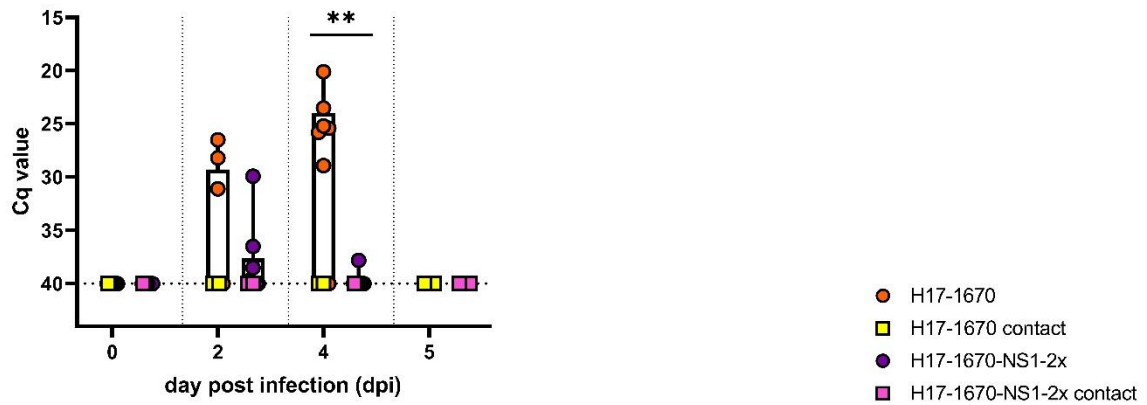

**B**

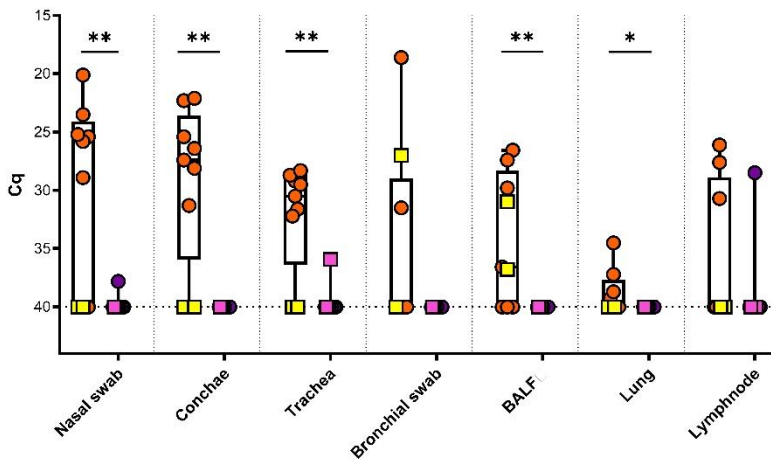

1017

1018 **Figure 7.** (A) Nasal viral excretion and (B) viral loads in respiratory tissues of pigs vaccinated  
 1019 with bat-swine Influenza A chimeric viruses [H17-1670] or [H17-1670-NS1-2x].

1020 \*\_\*\*\* indicate significance levels ( $p < 0.05$ ;  $< 0.01$ ;  $< 0.001$ )

## Modified live attenuated vaccine against swine Influenza A Virus

bioRxiv preprint doi: <https://doi.org/10.1101/2022.06.20.496807>; this version posted June 20, 2022. The copyright holder for this preprint (which was not certified by peer review) is the author/funder. All rights reserved. No reuse allowed without permission.

**A**

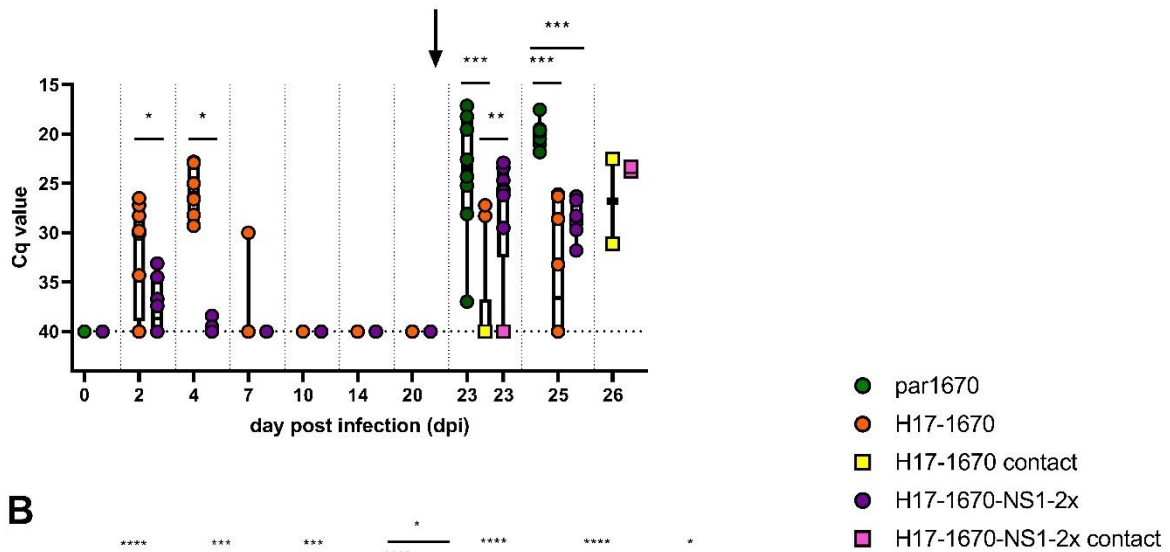

**B**

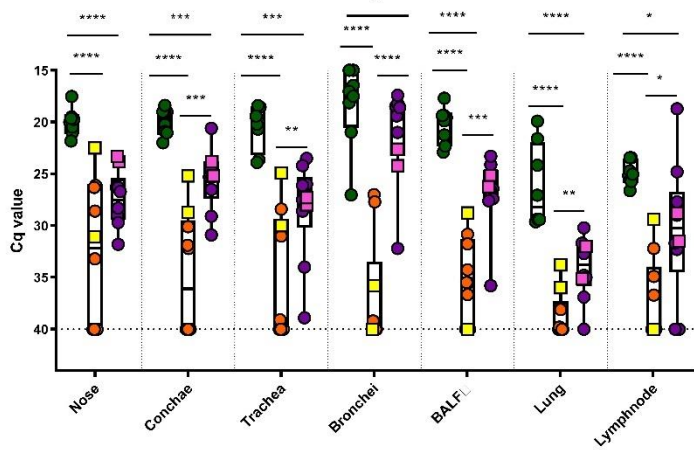

1021

1022 **Figure 8.** (A) Nasal viral excretion and (B) viral loads in respiratory tissues of pigs vaccinated  
 1023 with chimeric viruses [H17-1670] or [H17-1670-NS1-2x] and challenged with homologous  
 1024 virulent H1avN1 virus on day 21 post vaccination (black arrow).

1025 Green spheres show values of par1670 only for comparison; par1670 was not used for  
 1026 vaccination.

1027 \*\_\*\*\*\* indicate significance levels ( $p < 0.05$ ;  $< 0.01$ ;  $< 0.001$ )
